# Supplementary material for: Alchemical approach performance in calculating the ligand-binding free energy
Source: Royal Society of Chemistry journal article supplement (doi:10.1039/d4ra00692e), 2024-01-01
Supplement: d4ra00692e1.pdf [file d4ra00692e1.pdf]

Supporting Information

# Alchemical Approach Performance in Calculating the Ligand-Binding Free Energy

Son Tung Ngo,<sup>ab\*</sup> Quynh Mai Thai,<sup>ab</sup> Trung Hai Nguyen,<sup>ab</sup> Nguyen Ngoc Tuan,<sup>c</sup> T. Ngoc Han  
Pham,<sup>d</sup> Huong T. T. Phung,<sup>d</sup> and Duong Tuan Quang<sup>e\*</sup>

<sup>a</sup>*Laboratory of Biophysics, Institute for Advanced Study in Technology, Ton Duc Thang University, Ho Chi Minh City, Vietnam*

<sup>b</sup>*Faculty of Pharmacy, Ton Duc Thang University, Ho Chi Minh City, Vietnam*

<sup>c</sup>*Faculty of Applied Sciences, Ton Duc Thang University, Ho Chi Minh City, Vietnam*

<sup>d</sup>*NTT Hi-Tech Institute, Nguyen Tat Thanh University, Ho Chi Minh City, Vietnam*

<sup>e</sup>*Department of Chemistry, Hue University, Thua Thien Hue Province, Hue City, Vietnam*

\*Email: [ngosontung@tdtu.edu.vn](mailto:ngosontung@tdtu.edu.vn) and [dtquang@hueuni.edu.vn](mailto:dtquang@hueuni.edu.vn)

Sequence comparison between *Homo sapiens* and *Rattus norvegicus* of Glutamate Receptor, Ionotropic Kainate 1

Pairwise Alignment

Sequence 1: 2ZNS (*Homo sapiens*)

Sequence 2: 4DLD (*Rattus norvegicus*)

Sequence ends allowed to slide over each other

Alignment score: 248

Identities: 0.9766537

Similarities: 0.9766537

Similarity Matrix: MATCH

2ZNS EANRTLIVTTILEEPYVMYRKS~~DK~~PLYGNDRFEGYCLDLLKELSNILGFIYDVKLVPDGKYGAQN~~DK~~GEWNGMVKELIDH  
4DLD --NRTLIVTTILEEPYVMYRKS~~DK~~PLYGNDRFEGYCLDLLKELSNILGFIYDVKLVPDGKYGAQN~~DK~~GEWNGMVKELIDH

2ZNS RADLAVAPLTITYVREKVIDFSKPFMTLGISILYRKGTPI~~DS~~ADDLAKQTKIEYGAVRDGSTM~~TF~~FKKSKISTYEKMWAF  
4DLD RADLAVAPLTITYVREKVIDFSKPFMTLGISILYRKGTPI~~DS~~ADDLAKQTKIEYGAVRDGSTM~~TF~~FKKSKISTYEKMWAF

2ZNS MSSRQQTALV~~RS~~DEGIQRVLT~~TD~~YALLMESTSIEYVTQRN~~CN~~L~~LT~~QIGGLIDSKGYGVGTPIGSPYRDKITIAILQLQEE  
4DLD MSSRQQSALV~~KS~~DEGIQRVLT~~TD~~YALLMESTSIEYVTQRN~~CN~~L~~LT~~QIGGLIDSKGYGVGTPIGSPYRDKITIAILQLQEE

2ZNS GKLHMMKEK~~W~~WRGNGC-  
4DLD GKLHMMKEK~~W~~WRGNGCP

**Table S1.** 2D and 3D structure for all ligands of AmpC, GluK1, Hsp90 and SARS-CoV-2 Mpro systems

| N <sup>o</sup> | PDB ID | 2D Structure                                                                                                                                                                                                                                                                          | 3D Structure                                                                                                                                                                                                                                                                        |
|----------------|--------|---------------------------------------------------------------------------------------------------------------------------------------------------------------------------------------------------------------------------------------------------------------------------------------|-------------------------------------------------------------------------------------------------------------------------------------------------------------------------------------------------------------------------------------------------------------------------------------|
| 1              | 1XGI   | 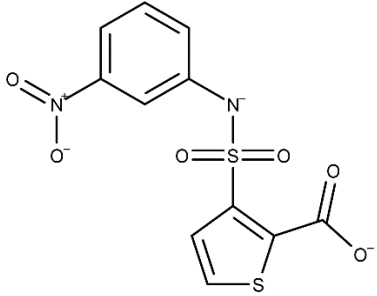 <p>The 2D chemical structure of ligand 1XGI consists of a central sulfonamide group (-SO<sub>2</sub>-NH-) connecting a 4-nitrophenyl ring and a 2-carboxylthiophen-5-yl ring.</p>                   |  <p>The 3D structure shows the ligand 1XGI (stick representation) bound within the active site of a protein, which is shown as a blue ribbon structure with a white surface representation.</p>   |
| 2              | 1XGJ   |  <p>The 2D chemical structure of ligand 1XGJ features a central sulfonamide group (-SO<sub>2</sub>-NH-) connecting a 4-hydroxy-3-carboxylphenyl ring and a 2-carboxylthiophen-5-yl ring.</p>        |  <p>The 3D structure shows the ligand 1XGJ (stick representation) bound within the active site of a protein, which is shown as a blue ribbon structure with a white surface representation.</p>  |
| 3              | 2HDU   |  <p>The 2D chemical structure of ligand 2HDU consists of a central thiophene ring substituted with a methylacetamido group (-NH-CO-CH<sub>3</sub>) and a carboxylate group (-COO<sup>-</sup>).</p> |  <p>The 3D structure shows the ligand 2HDU (stick representation) bound within the active site of a protein, which is shown as a blue ribbon structure with a white surface representation.</p> |

|   |      |                                                                                     |                                                                                      |
|---|------|-------------------------------------------------------------------------------------|--------------------------------------------------------------------------------------|
| 4 | 2PU2 | 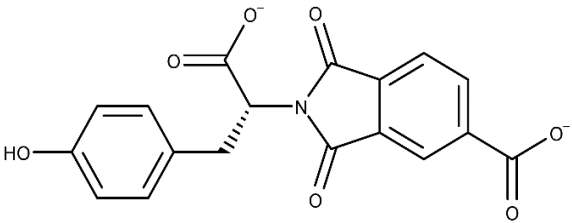   |    |
| 5 | 2R9W |    |    |
| 6 | 2R9X |  |  |
| 7 | 3GR2 |  |  |

|    |      |                                                                                                                                                                                                                                                                                                                              |                                                                                                                                                                                                                                                                                                         |
|----|------|------------------------------------------------------------------------------------------------------------------------------------------------------------------------------------------------------------------------------------------------------------------------------------------------------------------------------|---------------------------------------------------------------------------------------------------------------------------------------------------------------------------------------------------------------------------------------------------------------------------------------------------------|
| 8  | 4KZ3 | 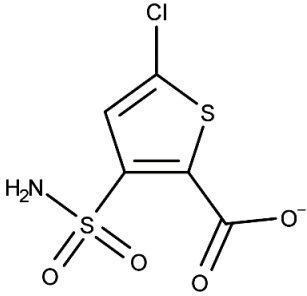 <p>Chemical structure of 5-chloro-L-methionine, a sulfur-containing amino acid. It features a thiazolidine ring with a chlorine atom at the 5-position, a methyl group at the 2-position, and a carboxylate group at the 4-position.</p>   |  <p>3D ribbon diagram of a protein structure (PDB ID: 4KZ3) showing a ligand (5-chloro-L-methionine) bound in the active site. The protein is shown in blue ribbon, and the ligand is shown in green sticks.</p>      |
| 9  | 4KZ5 |  <p>Chemical structure of a substituted benzimidazole derivative. It features a benzimidazole ring system with a methyl group at the 2-position, a chlorine atom at the 6-position, and a carboxamide group at the 4-position.</p>          |  <p>3D ribbon diagram of a protein structure (PDB ID: 4KZ5) showing a ligand (substituted benzimidazole) bound in the active site. The protein is shown in blue ribbon, and the ligand is shown in green sticks.</p>  |
| 10 | 4OKP |  <p>Chemical structure of a substituted thiazolidine derivative. It features a thiazolidine ring system with a methyl group at the 4-position, a carboxylate group at the 2-position, and a protonated amine group at the 3-position.</p> |  <p>3D ribbon diagram of a protein structure (PDB ID: 4OKP) showing a ligand (substituted thiazolidine) bound in the active site. The protein is shown in blue ribbon, and the ligand is shown in green sticks.</p> |

|    |      |                                                                                                                                                                                                                                                                                                                                                                                                                                                                                                                                          |                                                                                                                                                                                                                                                                                                                                                                                          |
|----|------|------------------------------------------------------------------------------------------------------------------------------------------------------------------------------------------------------------------------------------------------------------------------------------------------------------------------------------------------------------------------------------------------------------------------------------------------------------------------------------------------------------------------------------------|------------------------------------------------------------------------------------------------------------------------------------------------------------------------------------------------------------------------------------------------------------------------------------------------------------------------------------------------------------------------------------------|
| 11 | 1VSO | 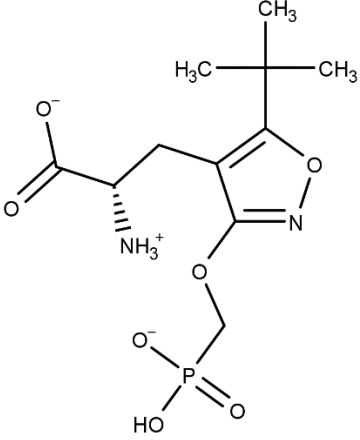 <p>The chemical structure of 1VSO is a complex molecule. It features a central five-membered ring containing an oxygen atom and a nitrogen atom. Attached to this ring are a methyl group (CH<sub>3</sub>), a tert-butyl group (C(CH<sub>3</sub>)<sub>3</sub>), a carboxylate group (COO<sup>-</sup>), and a phosphate group (PO<sub>3</sub><sup>-</sup>). A side chain containing an ammonium group (NH<sub>3</sub><sup>+</sup>) is also present.</p> |  <p>A 3D ribbon diagram of the protein structure 1VSO, shown in blue. The protein is surrounded by a white surface representation. The ligand 1VSO is shown as a stick model in the center, with atoms colored by element: carbon (green), oxygen (red), nitrogen (blue), and phosphorus (orange).</p> |
| 12 | 2PBW |  <p>The chemical structure of 2PBW is a complex molecule. It features a central five-membered ring containing an oxygen atom and a nitrogen atom. Attached to this ring are a methyl group (H<sub>3</sub>C), a carboxylate group (COO<sup>-</sup>), and a side chain containing a methyl group (CH<sub>3</sub>) and a carboxylate group (COO<sup>-</sup>). The side chain also includes a double bond and a methyl group (CH<sub>3</sub>).</p>         |  <p>A 3D ribbon diagram of the protein structure 2PBW, shown in blue. The protein is surrounded by a white surface representation. The ligand 2PBW is shown as a stick model in the center, with atoms colored by element: carbon (green), oxygen (red), and nitrogen (blue).</p>                    |
| 13 | 2ZNS |  <p>The chemical structure of 2ZNS is a simple molecule. It features a central five-membered ring containing an oxygen atom and a nitrogen atom. Attached to this ring are a methyl group (CH<sub>3</sub>), a carboxylate group (COO<sup>-</sup>), and a side chain containing a methyl group (CH<sub>3</sub>) and a carboxylate group (COO<sup>-</sup>). The side chain also includes a double bond and a methyl group (CH<sub>3</sub>).</p>         |  <p>A 3D ribbon diagram of the protein structure 2ZNS, shown in blue. The protein is surrounded by a white surface representation. The ligand 2ZNS is shown as a stick model in the center, with atoms colored by element: carbon (green), oxygen (red), and nitrogen (blue).</p>                    |



|    |      |                                                                                     |                                                                                      |
|----|------|-------------------------------------------------------------------------------------|--------------------------------------------------------------------------------------|
| 14 | 2ZNU | 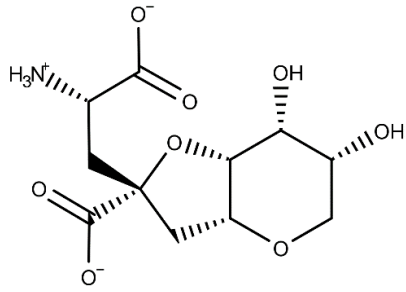   |   |
| 15 | 3FV1 |    |   |
| 16 | 3FVN |  |  |
| 17 | 3FVG |  |  |

|    |      |                                                                                                                                                                                                                                                                                                                                                                                                                                                                                                                  |                                                                                                                                                                                                                                                   |
|----|------|------------------------------------------------------------------------------------------------------------------------------------------------------------------------------------------------------------------------------------------------------------------------------------------------------------------------------------------------------------------------------------------------------------------------------------------------------------------------------------------------------------------|---------------------------------------------------------------------------------------------------------------------------------------------------------------------------------------------------------------------------------------------------|
| 18 | 3FVK | 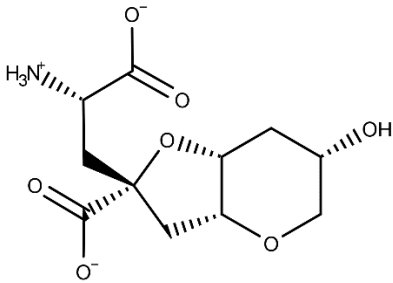 <p>Chemical structure of 3FVK, a cyclic peptide derivative. It features a central five-membered ring with an oxygen atom. Attached to this ring are a methylammonium group (<math>\text{H}_3\text{N}^+</math>), a carboxylate group (<math>\text{COO}^-</math>), a hydroxyl group (<math>\text{OH}</math>), and a side chain containing another carboxylate group (<math>\text{COO}^-</math>).</p>                             |  <p>3D ribbon diagram of a protein structure (blue) with the ligand 3FVK (green sticks) bound in the active site. The protein surface is shown in white.</p>    |
| 19 | 4DLD |  <p>Chemical structure of 4DLD, a linear molecule. It consists of a central benzene ring substituted with a chlorine atom (<math>\text{Cl}</math>), a nitro group (<math>\text{NO}_2</math>), and a side chain containing a methylammonium group (<math>\text{H}_3\text{N}^+</math>), a carboxylate group (<math>\text{COO}^-</math>), and a propyl chain ending in another carboxylate group (<math>\text{COO}^-</math>).</p> |  <p>3D ribbon diagram of a protein structure (blue) with the ligand 4DLD (green sticks) bound in the active site. The protein surface is shown in white.</p>   |
| 20 | 4E0X |  <p>Chemical structure of 4E0X, a cyclic peptide derivative. It features a central five-membered ring with an oxygen atom and a methylammonium group (<math>\text{NH}_2^+</math>). Attached to this ring are a methyl group (<math>\text{CH}_3</math>), a vinyl group (<math>\text{H}_2\text{C}=\text{CH}</math>), and a side chain containing a carboxylate group (<math>\text{COO}^-</math>).</p>                           |  <p>3D ribbon diagram of a protein structure (blue) with the ligand 4E0X (green sticks) bound in the active site. The protein surface is shown in white.</p> |



|    |      |                                                                                                                                                                                                                                                                                                                                                                                                                                                                                                                                                                                                                                                                                                     |                                                                                                                                                                                                                                                                                                                                                                                                  |
|----|------|-----------------------------------------------------------------------------------------------------------------------------------------------------------------------------------------------------------------------------------------------------------------------------------------------------------------------------------------------------------------------------------------------------------------------------------------------------------------------------------------------------------------------------------------------------------------------------------------------------------------------------------------------------------------------------------------------------|--------------------------------------------------------------------------------------------------------------------------------------------------------------------------------------------------------------------------------------------------------------------------------------------------------------------------------------------------------------------------------------------------|
| 21 | 2QG0 | 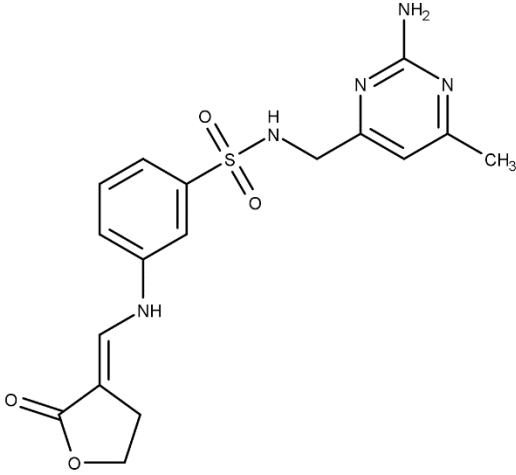 <p>Chemical structure of ligand 2QG0: A 2,4-diaminopyrimidin-5-ylmethylsulfonamide derivative. The pyrimidine ring has an amino group (NH<sub>2</sub>) at position 2 and a methyl group (CH<sub>3</sub>) at position 4. The 5-position is substituted with a methylene group (-CH<sub>2</sub>-) which is further substituted with a sulfonamide group (-SO<sub>2</sub>NH-). The nitrogen of the sulfonamide group is attached to a para-substituted benzene ring. This benzene ring is also substituted at the other para position with an imine group (-NH-CH=) which is attached to a furan-2(5H)-one ring.</p> |  <p>3D ribbon and surface representation of protein 2QG0. The protein backbone is shown as a blue ribbon, and the surface is shown as a white mesh. The ligand is shown as a stick model with green carbon atoms, red oxygen atoms, and blue nitrogen atoms, bound within the protein's binding pocket.</p>   |
| 22 | 2QG2 |  <p>Chemical structure of ligand 2QG2: A 2-amino-5-methylpyrimidin-4-ylmethylsulfonamide derivative. The pyrimidine ring has an amino group (NH<sub>2</sub>) at position 2 and a methyl group (H<sub>3</sub>C) at position 5. The 4-position is substituted with a methylene group (-CH<sub>2</sub>-) which is further substituted with a sulfonamide group (-SO<sub>2</sub>NH-). The nitrogen of the sulfonamide group is attached to a benzene ring. This benzene ring is also substituted at the para position with an imine group (-NH-CH=) which is attached to a furan-2(5H)-one ring.</p>                  |  <p>3D ribbon and surface representation of protein 2QG2. The protein backbone is shown as a blue ribbon, and the surface is shown as a white mesh. The ligand is shown as a stick model with green carbon atoms, red oxygen atoms, and blue nitrogen atoms, bound within the protein's binding pocket.</p>  |
| 23 | 3K97 |  <p>Chemical structure of ligand 3K97: A 2-(2-methylphenyl)pyrrolidine-1-carboxamide derivative. The pyrrolidine ring is substituted at the 2-position with a methyl group (CH<sub>3</sub>) and at the 1-position with a carbonyl group (-C(=O)-). The nitrogen of the carbonyl group is attached to a benzene ring. This benzene ring is also substituted at the para position with a hydroxyl group (-OH) and at the other para position with a chlorine atom (-Cl). The oxygen of the hydroxyl group is shown as O<sup>-</sup>.</p>                                                                           |  <p>3D ribbon and surface representation of protein 3K97. The protein backbone is shown as a blue ribbon, and the surface is shown as a white mesh. The ligand is shown as a stick model with green carbon atoms, red oxygen atoms, and blue nitrogen atoms, bound within the protein's binding pocket.</p> |



|    |      |                                                                                     |                                                                                       |
|----|------|-------------------------------------------------------------------------------------|---------------------------------------------------------------------------------------|
| 28 | 4CWT | 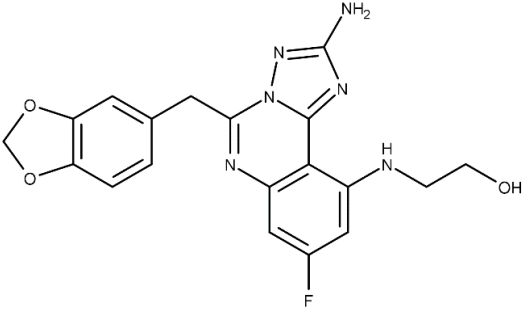   |    |
| 29 | 4NH8 |   |    |
| 30 | 4O07 |  |  |

|    |      |                                                                                     |                                                                                      |
|----|------|-------------------------------------------------------------------------------------|--------------------------------------------------------------------------------------|
| 31 | 6M2N | 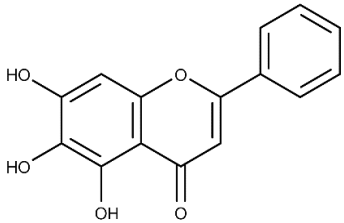   |    |
| 32 | 6WTT |    |   |
| 33 | 6XBG |  |  |

|    |      |                                                                                                                                                                                                                                                                                                                                                                                              |                                                                                                                                                                                                                                                              |
|----|------|----------------------------------------------------------------------------------------------------------------------------------------------------------------------------------------------------------------------------------------------------------------------------------------------------------------------------------------------------------------------------------------------|--------------------------------------------------------------------------------------------------------------------------------------------------------------------------------------------------------------------------------------------------------------|
| 34 | 6XMK | 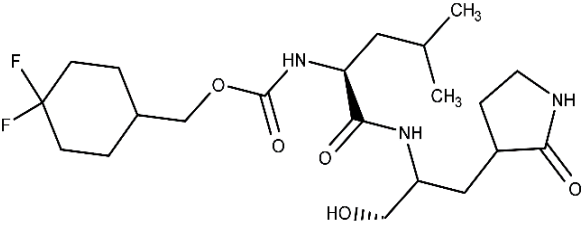 <p>Chemical structure of ligand 6XMK, featuring a piperidine ring substituted with two fluorine atoms, connected via a methylene group to a carbonyl group. This carbonyl is further linked to a complex chain containing a secondary amine, a methyl group, a hydroxyl group, and a pyrrolidine ring.</p> |  <p>3D ribbon diagram of the protein structure (blue) with the ligand 6XMK (green sticks) bound in the active site, overlaid on a light blue surface representation.</p>   |
| 35 | 7B3E |  <p>Chemical structure of ligand 7B3E, a flavone derivative with multiple hydroxyl groups on the A and C rings.</p>                                                                                                                                                                                         |  <p>3D ribbon diagram of the protein structure (blue) with the ligand 7B3E (green sticks) bound in the active site, overlaid on a light blue surface representation.</p>  |
| 36 | 7LCR |  <p>Chemical structure of ligand 7LCR, featuring a piperidine ring substituted with two methyl groups and a hydroxyl group, connected via a carbonyl group to a benzene ring with a fluorine substituent. It also includes a pyrrolidine ring.</p>                                                        |  <p>3D ribbon diagram of the protein structure (blue) with the ligand 7LCR (green sticks) bound in the active site, overlaid on a light blue surface representation.</p> |



|    |      |                                                                                                                                                                                                                                                                                                   |                                                                                                                                                                                                                                                          |
|----|------|---------------------------------------------------------------------------------------------------------------------------------------------------------------------------------------------------------------------------------------------------------------------------------------------------|----------------------------------------------------------------------------------------------------------------------------------------------------------------------------------------------------------------------------------------------------------|
| 37 | 7L8I | 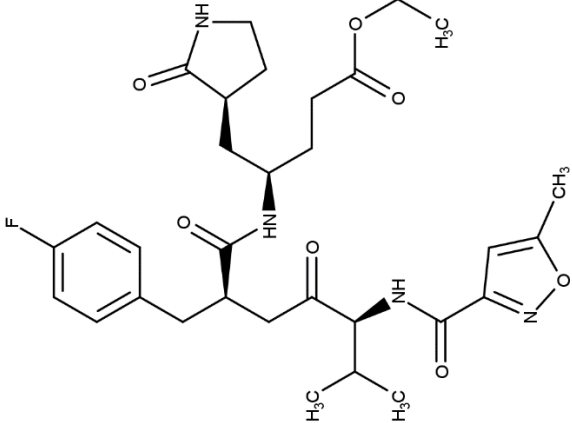 <p>Chemical structure of ligand 7L8I, featuring a central chain with a 4-fluorophenyl group, a pyrrolidine ring, a propanoic acid ethyl ester, a methyl group, and a 5-methylisoxazole-3-carboxamide group.</p> |  <p>3D ribbon diagram of protein 7L8I (blue) with the ligand (green sticks) bound in the active site, overlaid on a white surface representation of the protein.</p>   |
| 38 | 7LDL |  <p>Chemical structure of ligand 7LDL, featuring a central chain with a 5-methoxy-1H-indole-3-carboxamide group, a piperidine ring with two methyl groups, a hydroxymethyl group, and a pyrrolidine ring.</p>   |  <p>3D ribbon diagram of protein 7LDL (blue) with the ligand (green sticks) bound in the active site, overlaid on a white surface representation of the protein.</p>  |
| 39 | 7NG3 |  <p>Chemical structure of ligand 7NG3, featuring a central chain with a benzyl carbamate group, a piperidine ring with two methyl groups, a hydroxymethyl group, and a 2-methylbutyl group.</p>                |  <p>3D ribbon diagram of protein 7NG3 (blue) with the ligand (green sticks) bound in the active site, overlaid on a white surface representation of the protein.</p> |



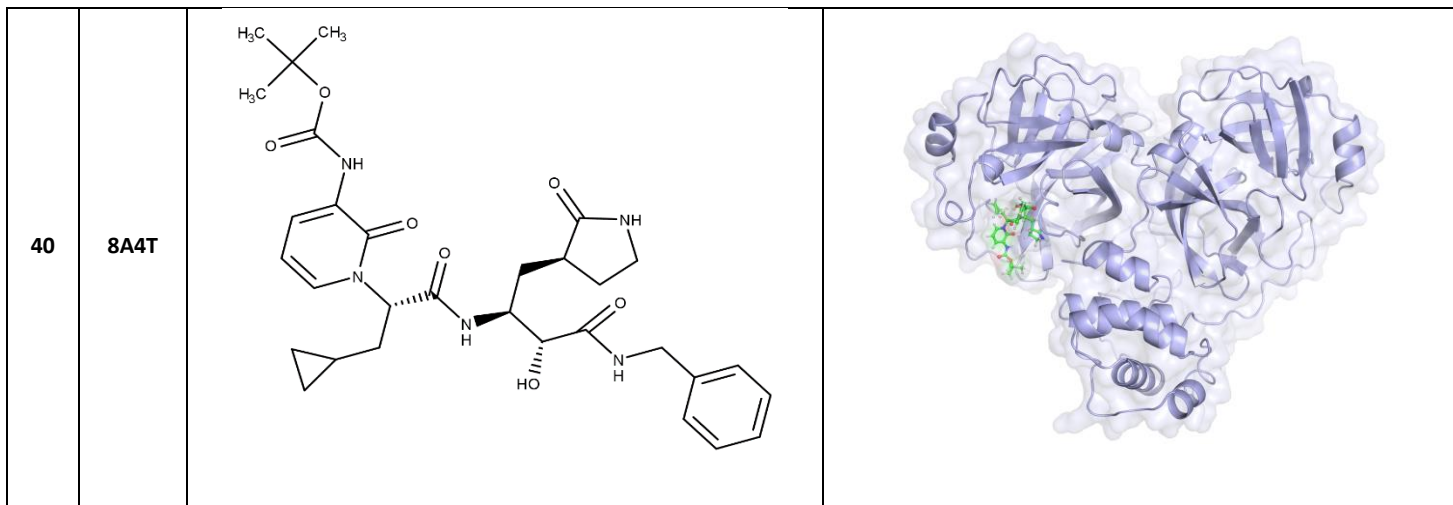

**Table S2.** All-atom RMSD of AmpC + ligand and ligand in solution systems.

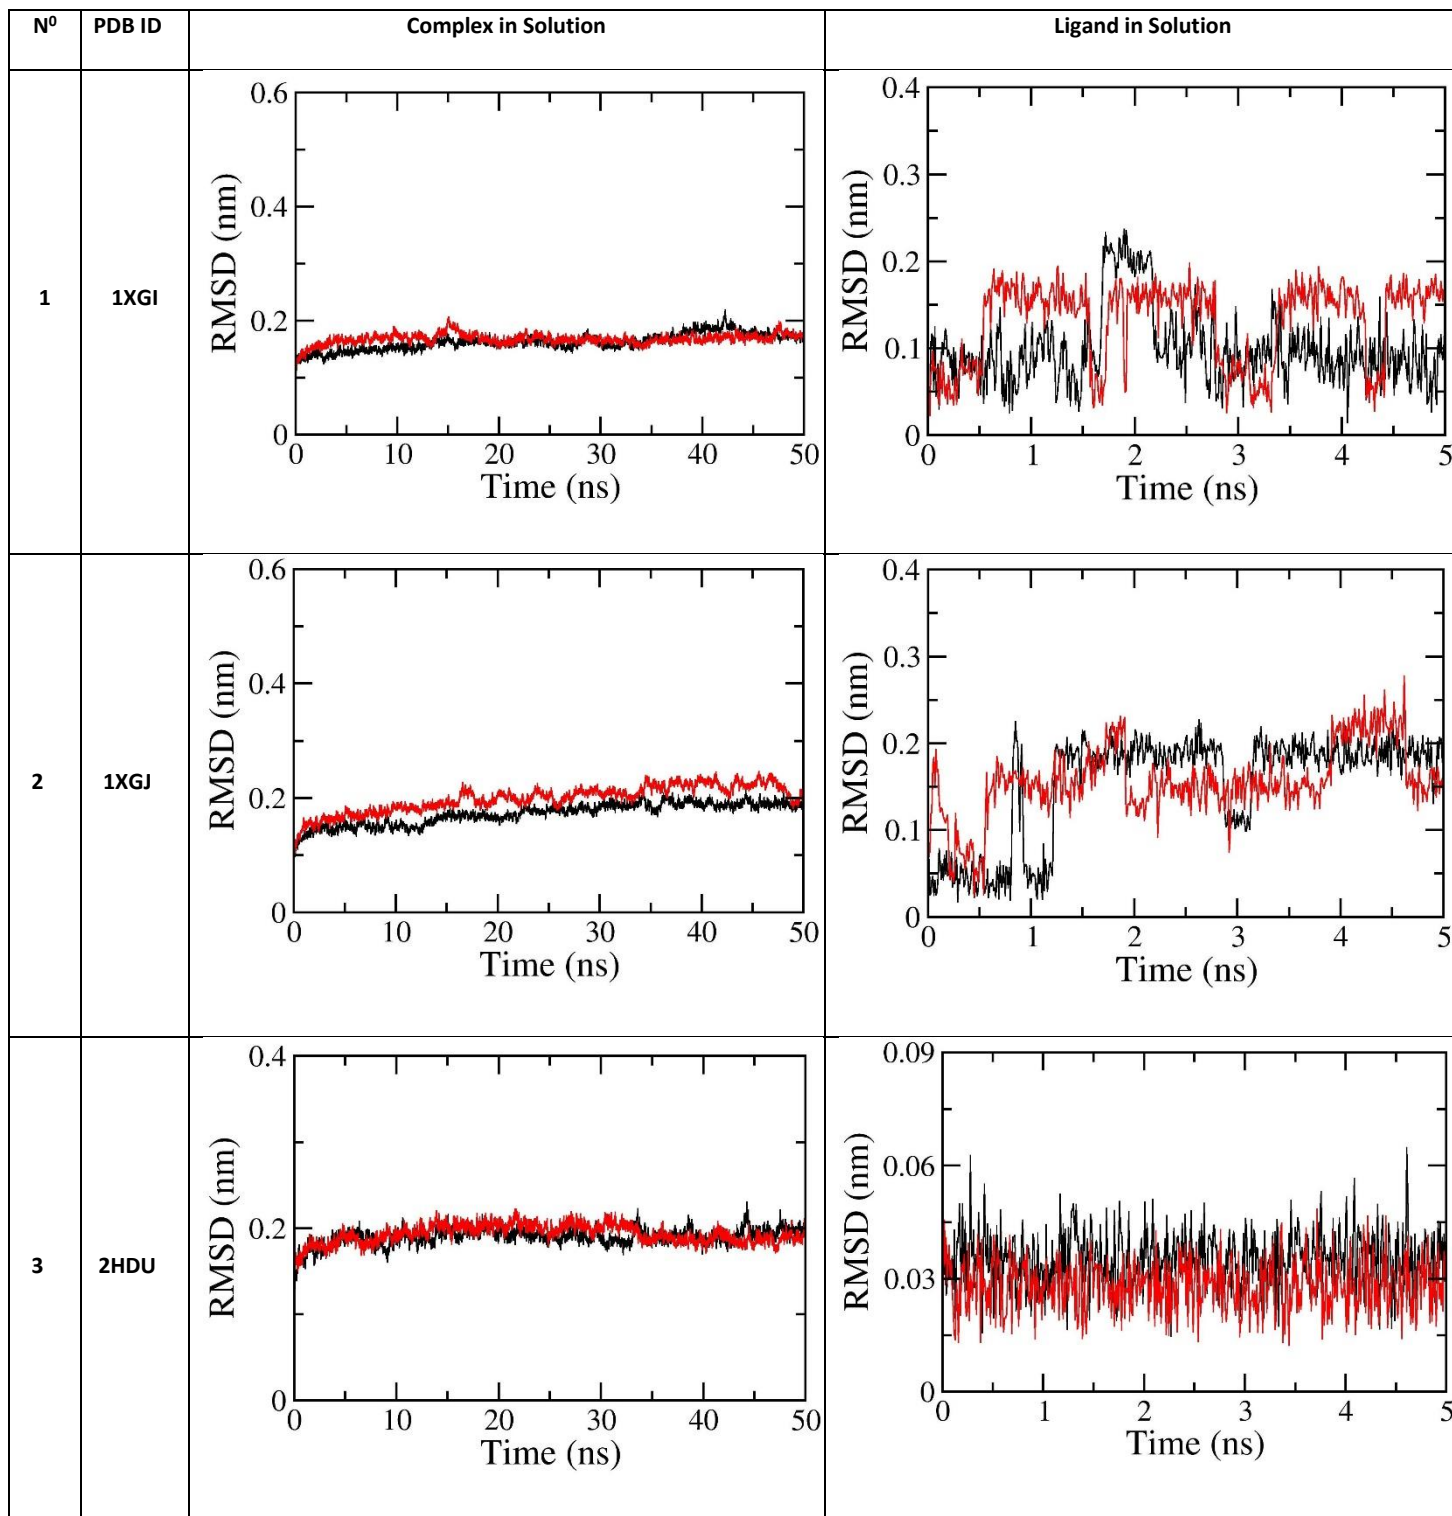

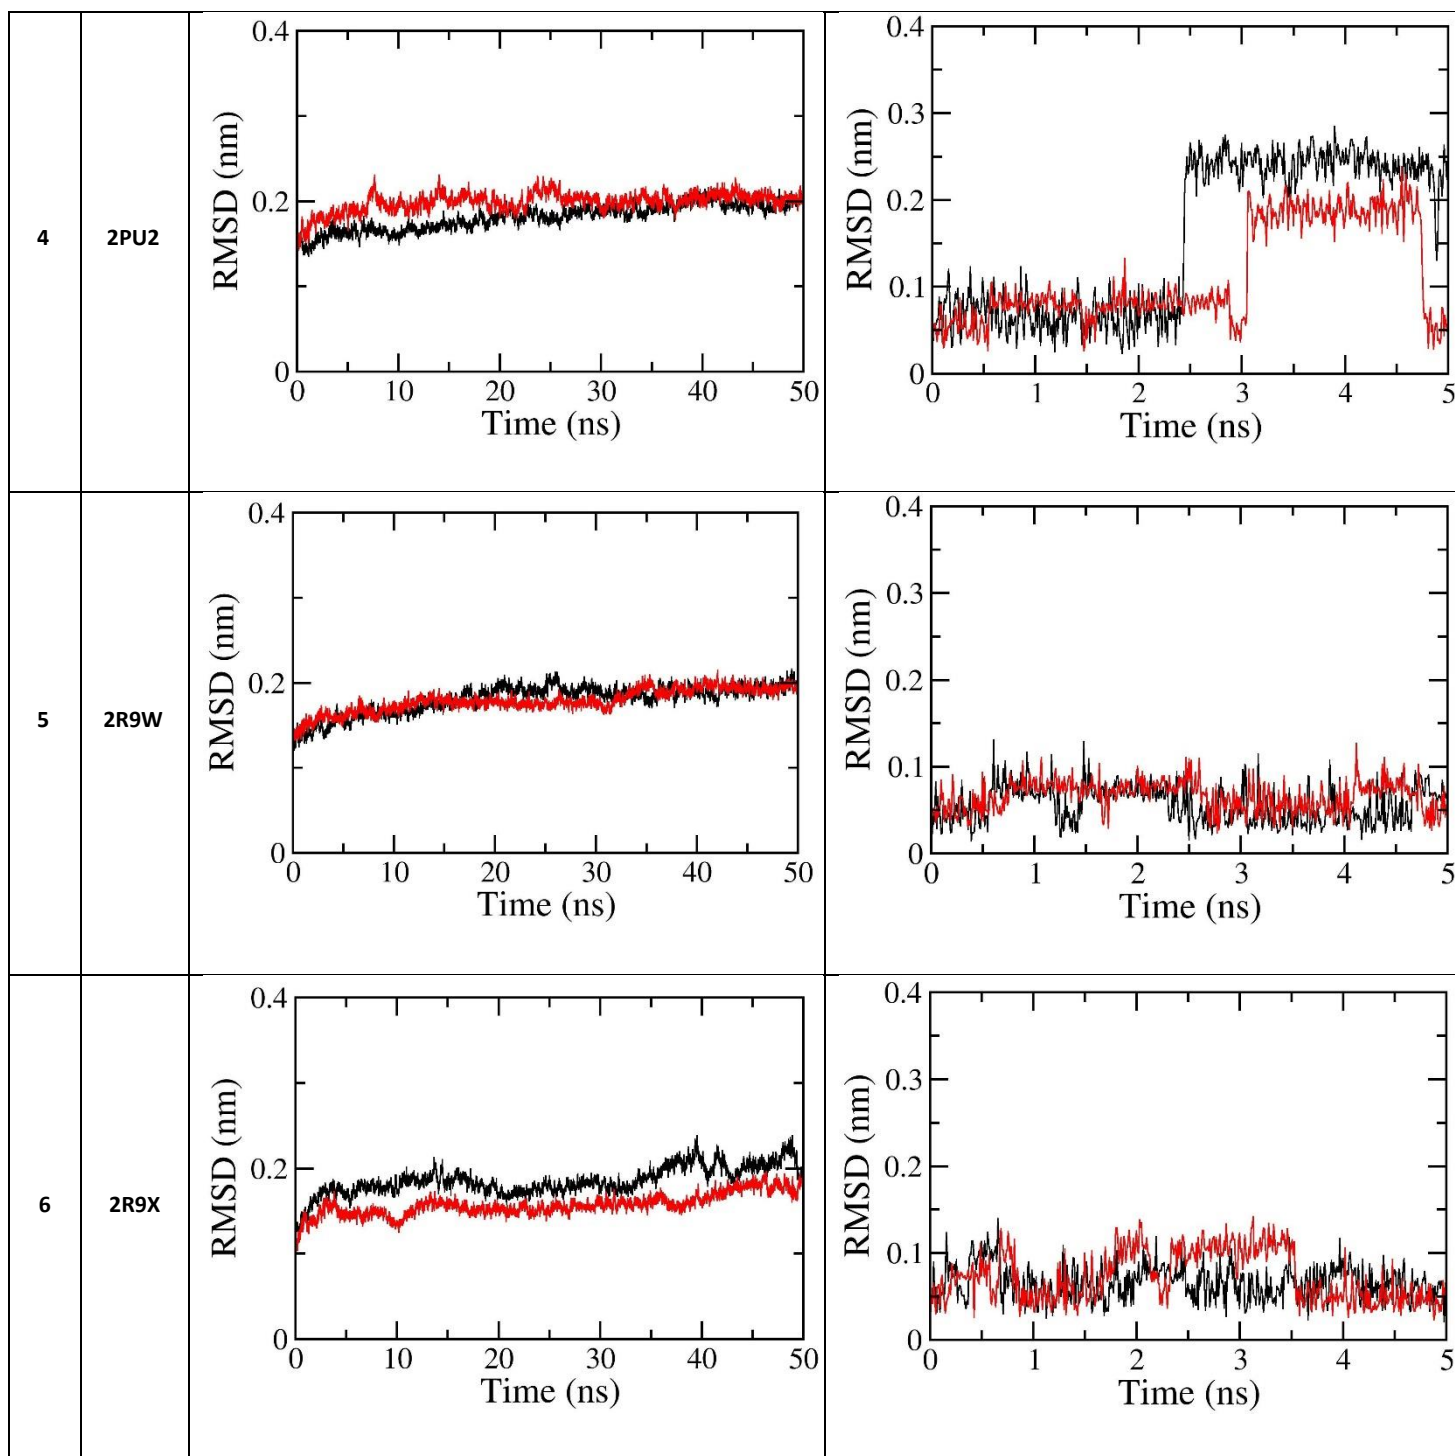

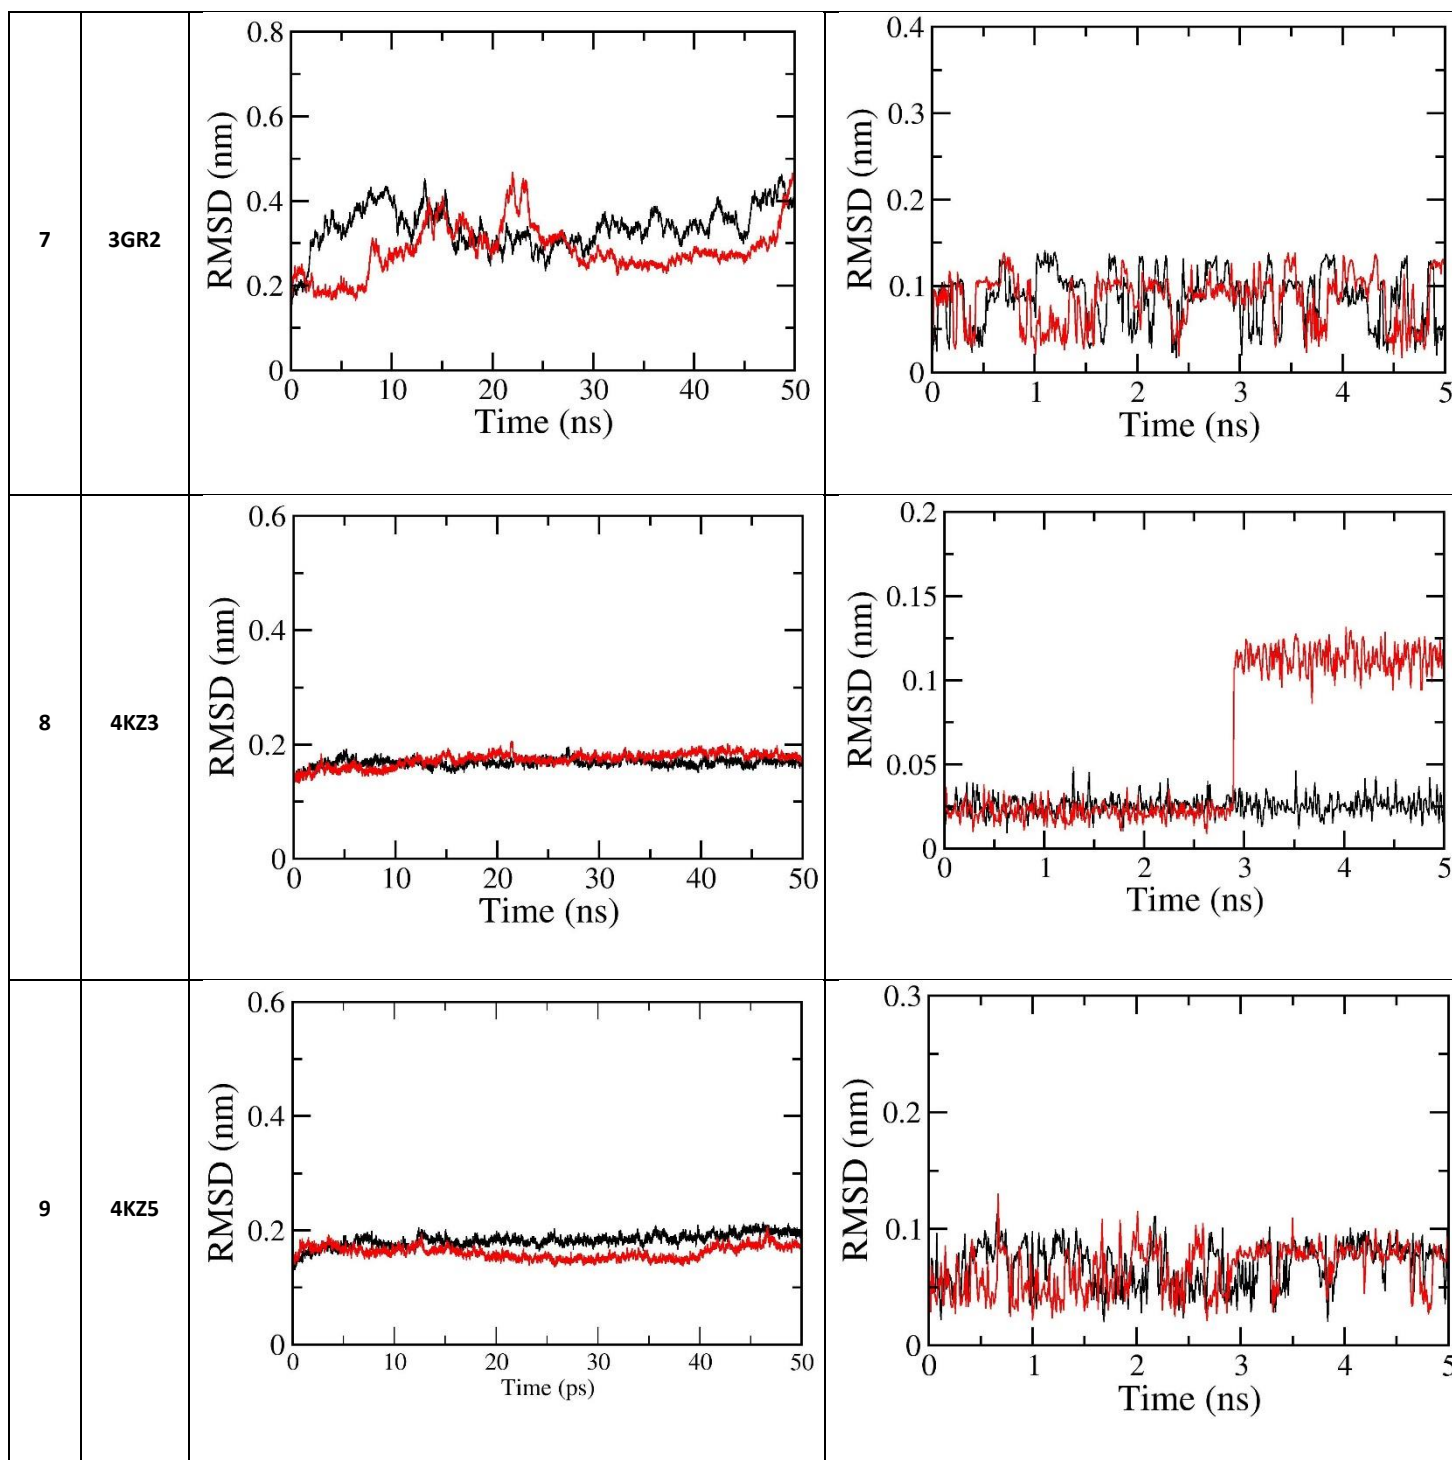

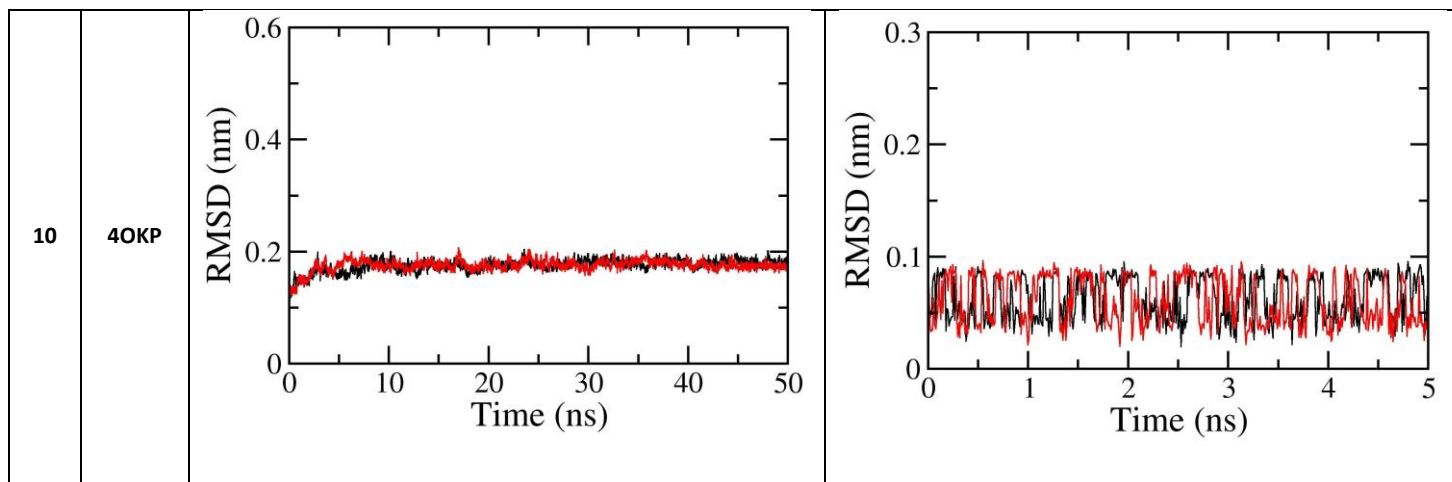

**Table S3.** All-atom RMSD of GluK1 + ligand and ligand in solution systems.

| N <sup>o</sup> | PDB ID | Complex in Solution                                                                                                                                                                                                                                                                                                                    | Ligand in Solution                                                                                                                                                                                                                                                                                    |
|----------------|--------|----------------------------------------------------------------------------------------------------------------------------------------------------------------------------------------------------------------------------------------------------------------------------------------------------------------------------------------|-------------------------------------------------------------------------------------------------------------------------------------------------------------------------------------------------------------------------------------------------------------------------------------------------------|
| 1              | 1VSO   | 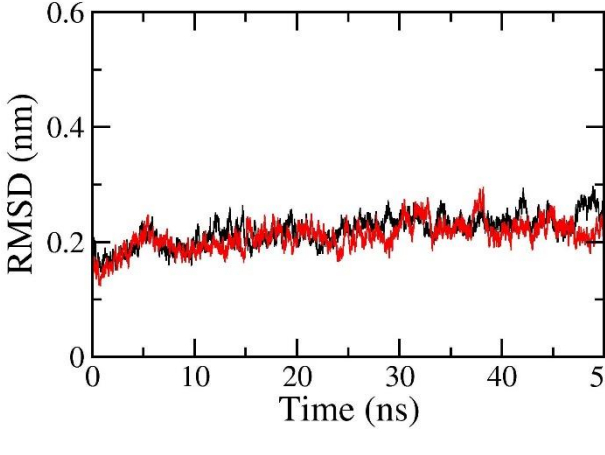 <p>RMSD (nm) vs Time (ns) for 1VSO complex in solution. The y-axis ranges from 0 to 0.6 nm, and the x-axis ranges from 0 to 50 ns. Two lines (black and red) fluctuate between approximately 0.15 and 0.3 nm.</p>                                    |  <p>RMSD (nm) vs Time (ns) for 1VSO ligand in solution. The y-axis ranges from 0 to 0.4 nm, and the x-axis ranges from 0 to 5 ns. Two lines (black and red) fluctuate between approximately 0.1 and 0.2 nm.</p>     |
| 2              | 2PBW   |  <p>RMSD (nm) vs Time (ns) for 2PBW complex in solution. The y-axis ranges from 0 to 0.6 nm, and the x-axis ranges from 0 to 50 ns. Two lines (black and red) fluctuate between approximately 0.1 and 0.2 nm.</p>                                    |  <p>RMSD (nm) vs Time (ns) for 2PBW ligand in solution. The y-axis ranges from 0 to 0.4 nm, and the x-axis ranges from 0 to 5 ns. Two lines (black and red) fluctuate between approximately 0.05 and 0.2 nm.</p>   |
| 3              | 2ZNS   |  <p>RMSD (nm) vs Time (ns) for 2ZNS complex in solution. The y-axis ranges from 0 to 1.5 nm, and the x-axis ranges from 0 to 50 ns. Two lines (black and red) show a significant increase from approximately 0.2 nm at 0 ns to 1.0 nm at 50 ns.</p> |  <p>RMSD (nm) vs Time (ns) for 2ZNS ligand in solution. The y-axis ranges from 0 to 0.4 nm, and the x-axis ranges from 0 to 5 ns. Two lines (black and red) fluctuate between approximately 0.05 and 0.15 nm.</p> |



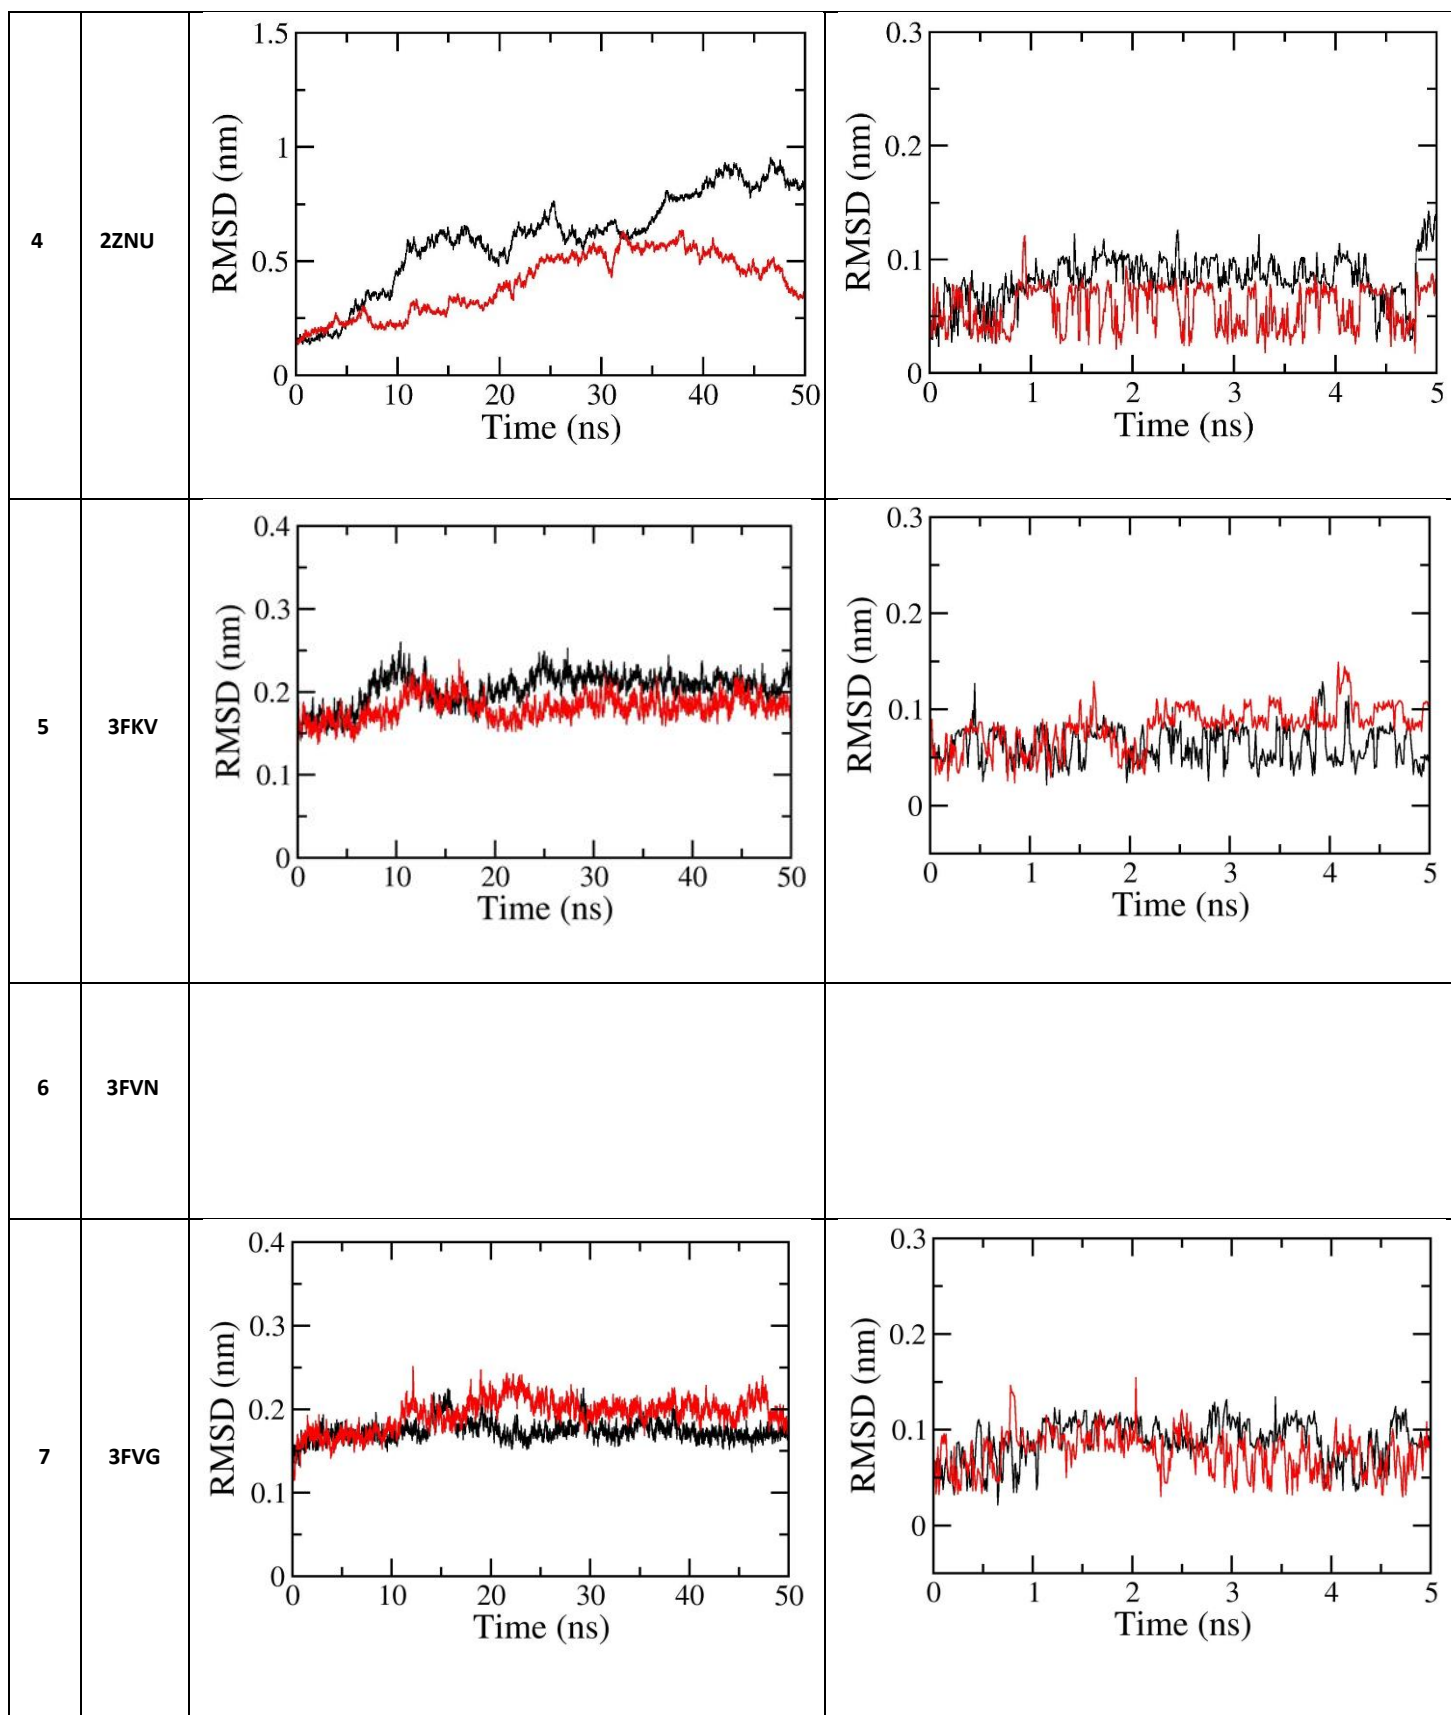

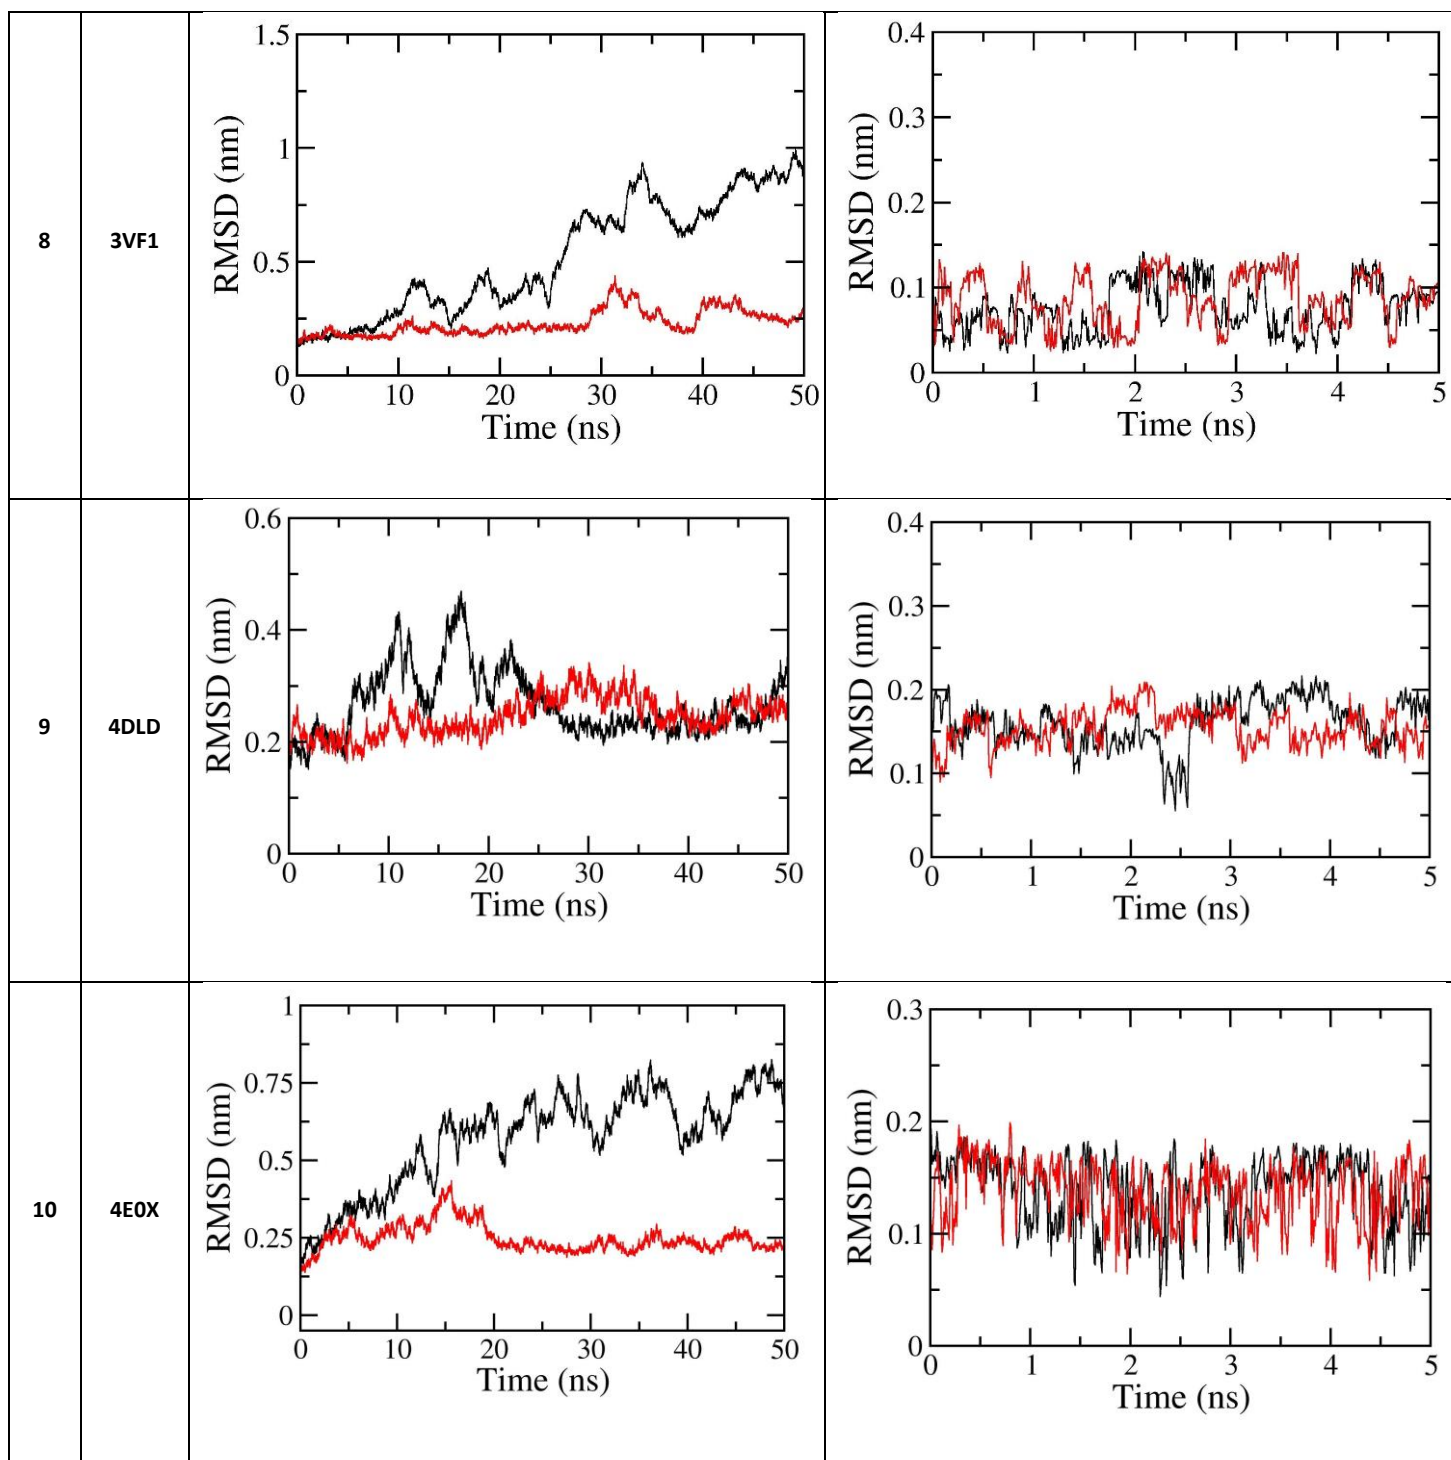

**Table S4.** All-atom RMSD of Hsp90 + ligand and ligand in solution systems.

| N <sup>o</sup> | PDB ID | Complex in Solution | Ligand in Solution |
|----------------|--------|---------------------|--------------------|
| 1              | 2QG0   |                     |                    |
| 2              | 2QG2   |                     |                    |
| 3              | 3K97   |                     |                    |

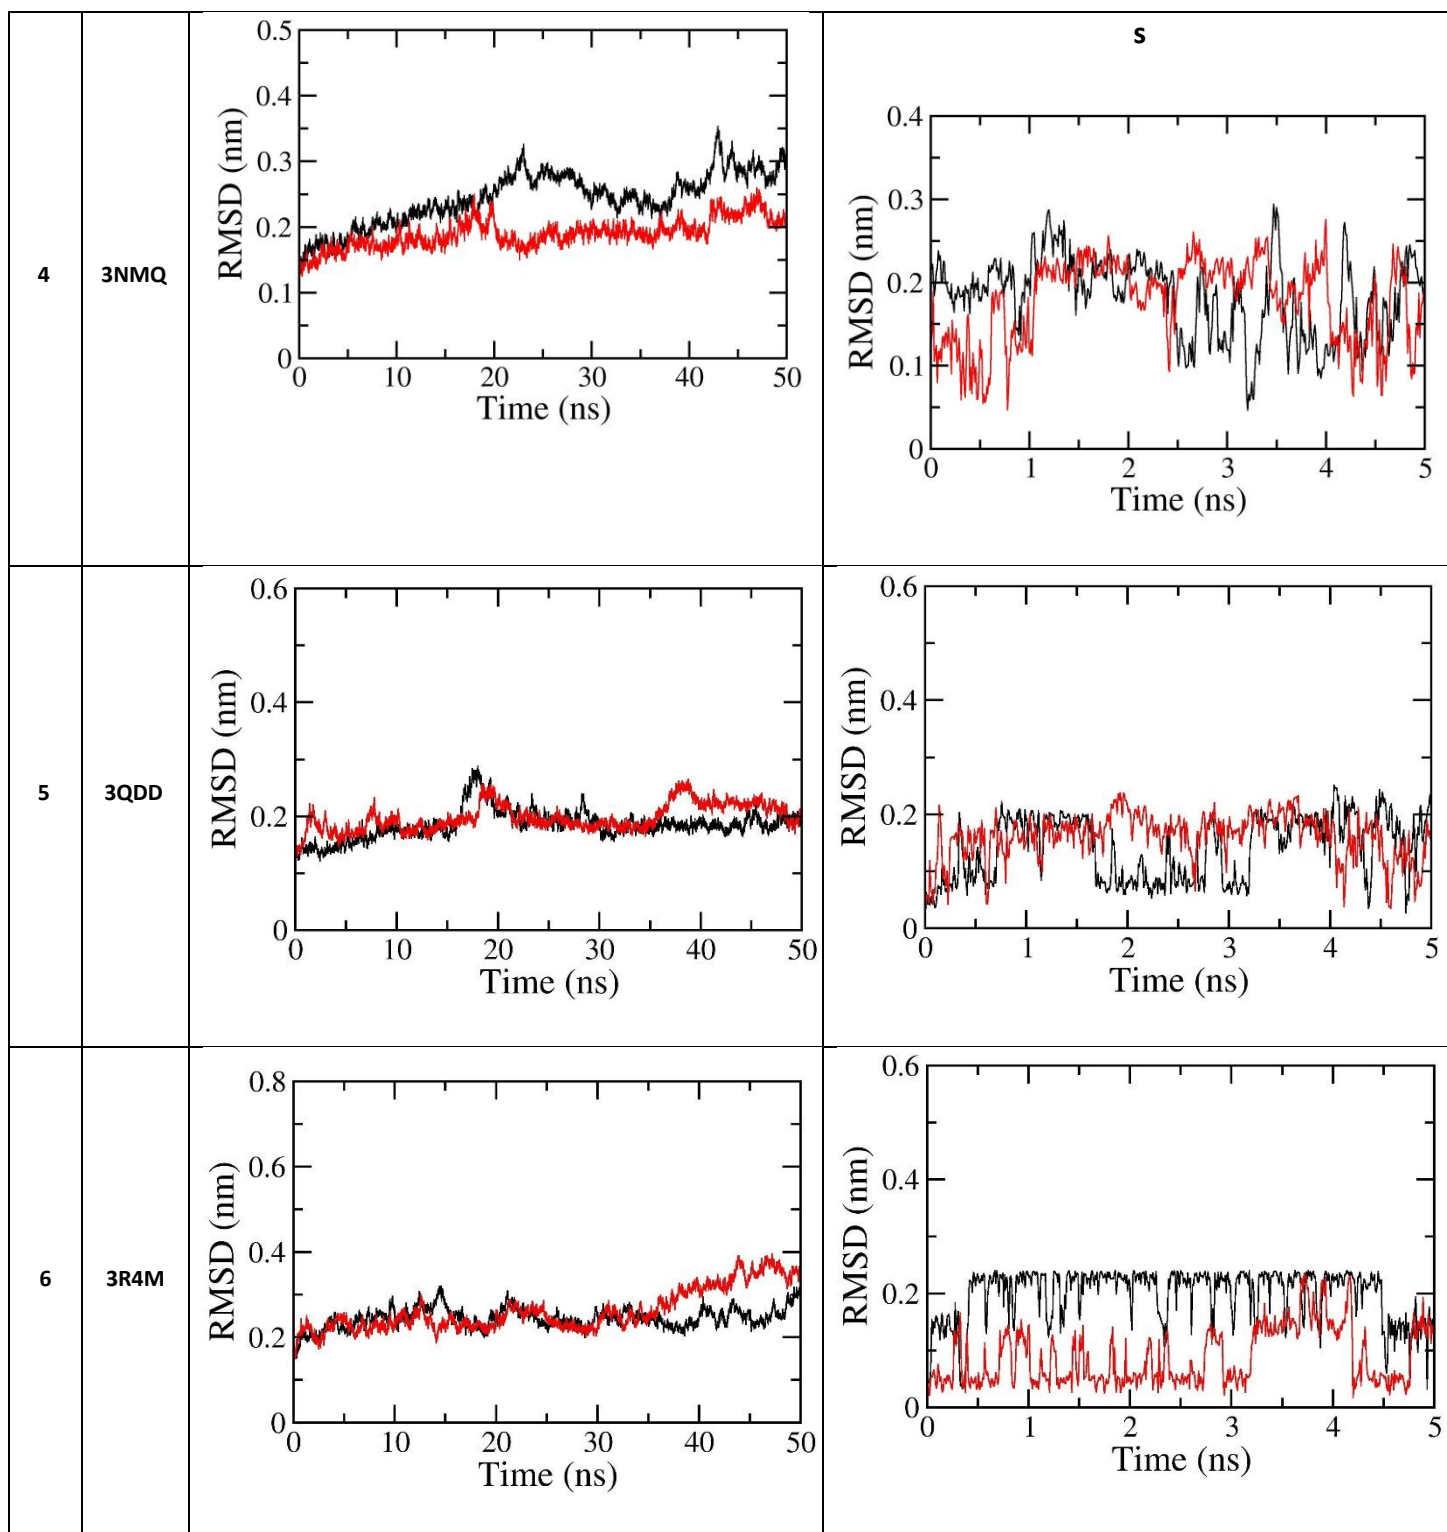

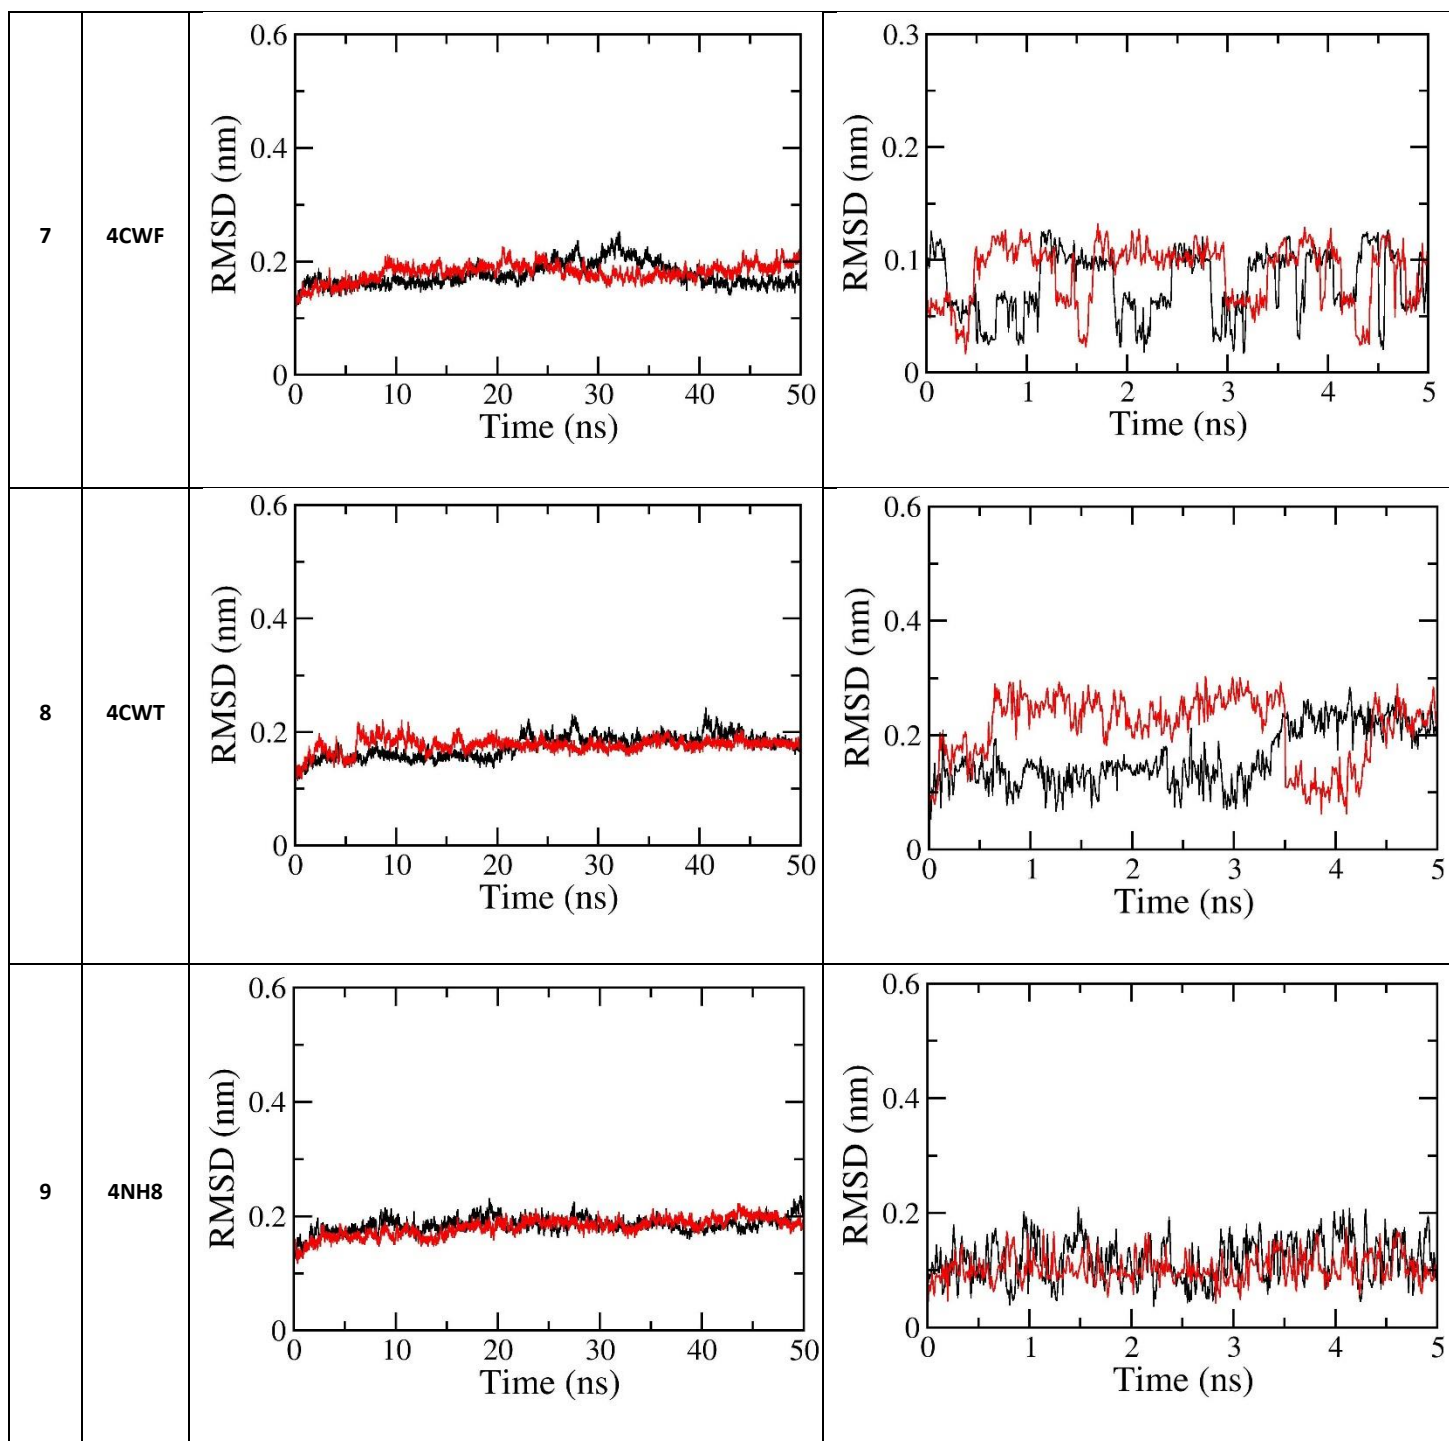

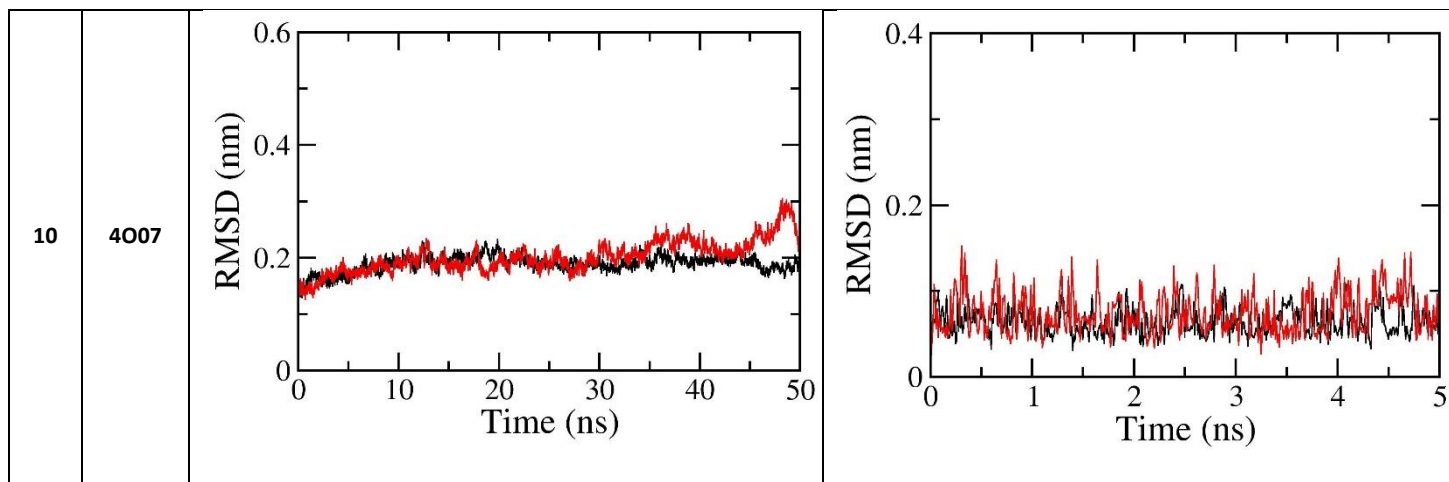



**Table S5.** All-atom RMSD of SARS-CoV-2 Mpro + ligand and ligand in solution systems.

| N° | PDB ID | Complex in Solution | Ligand in Solution |
|----|--------|---------------------|--------------------|
| 1  | 6M2N   |                     |                    |
| 2  | 6WTT   |                     |                    |
| 3  | 6XBG   |                     |                    |

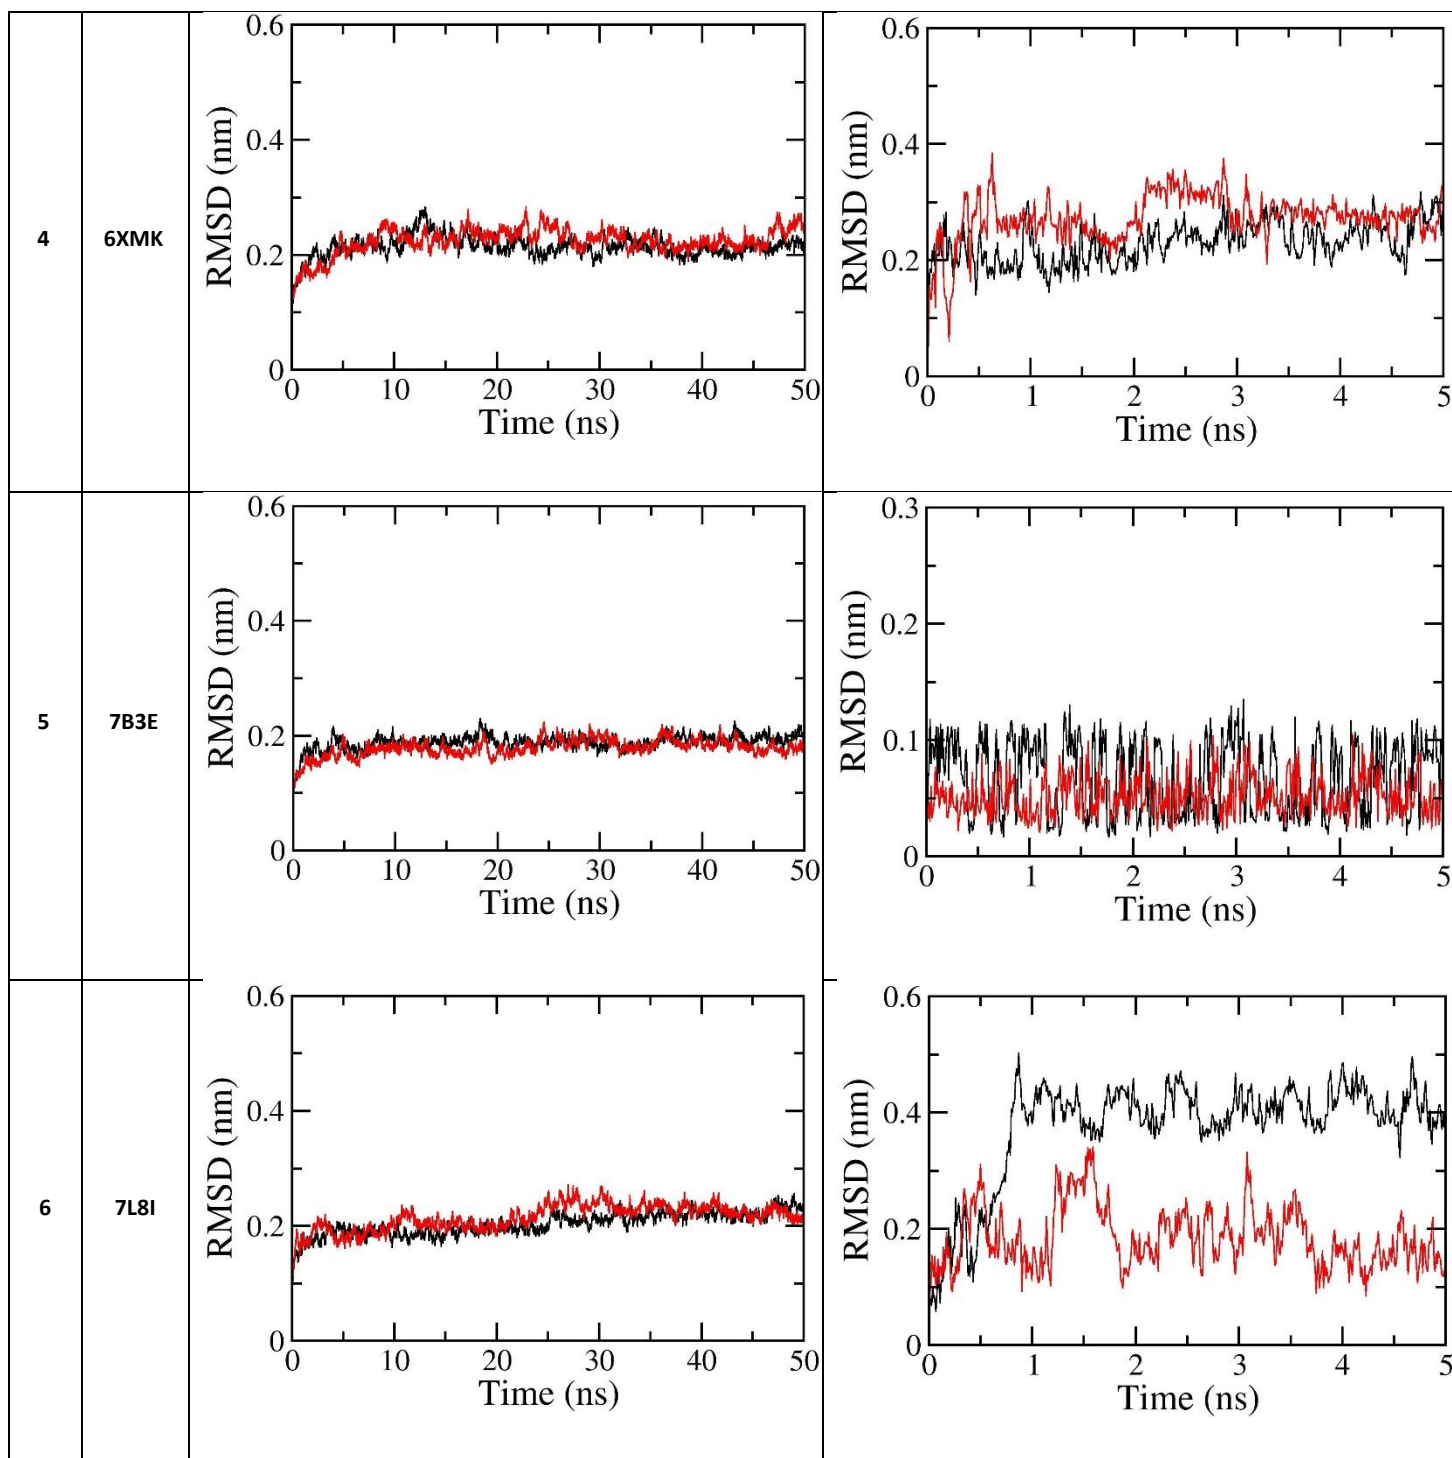

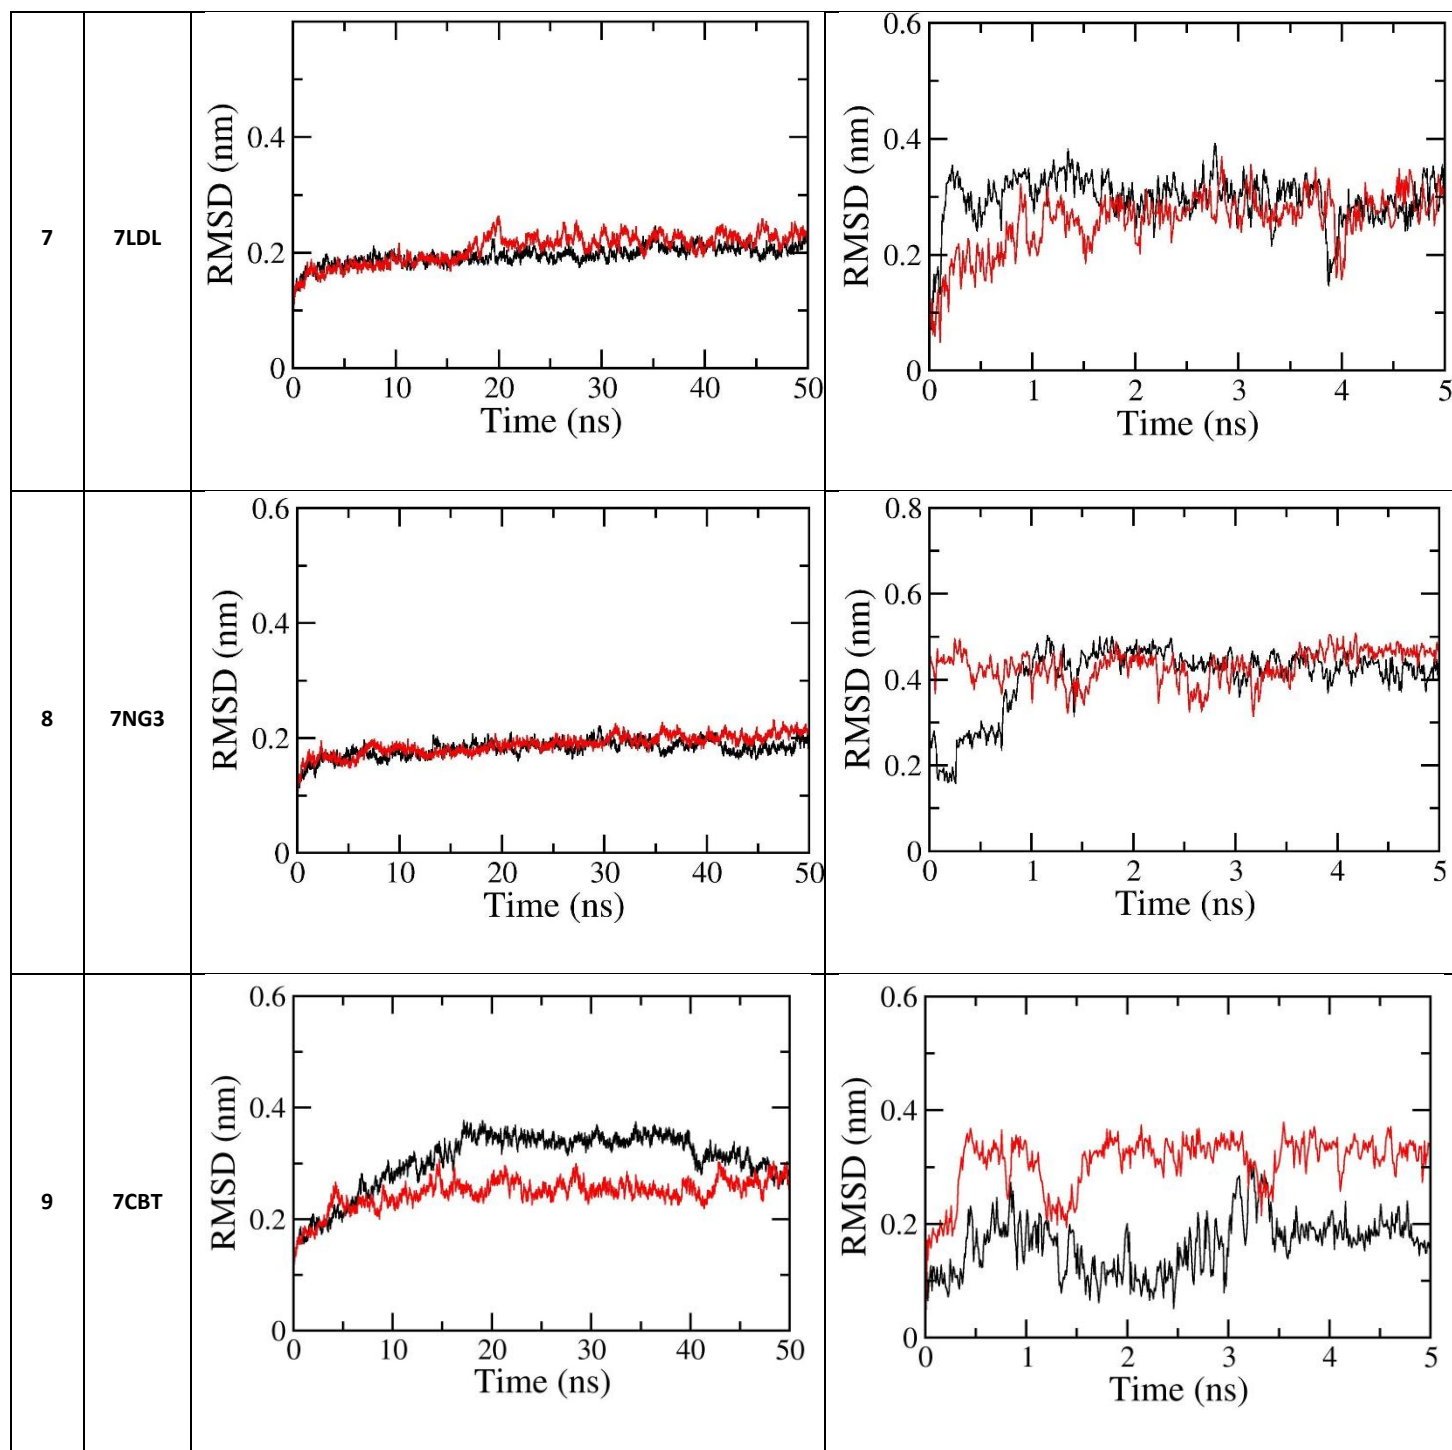

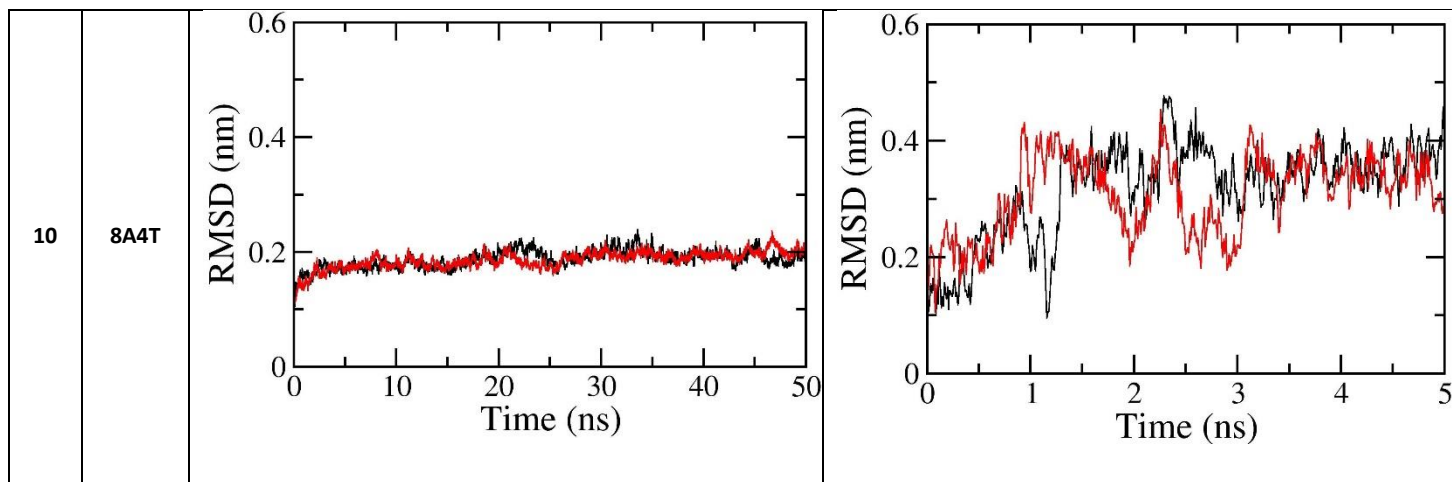

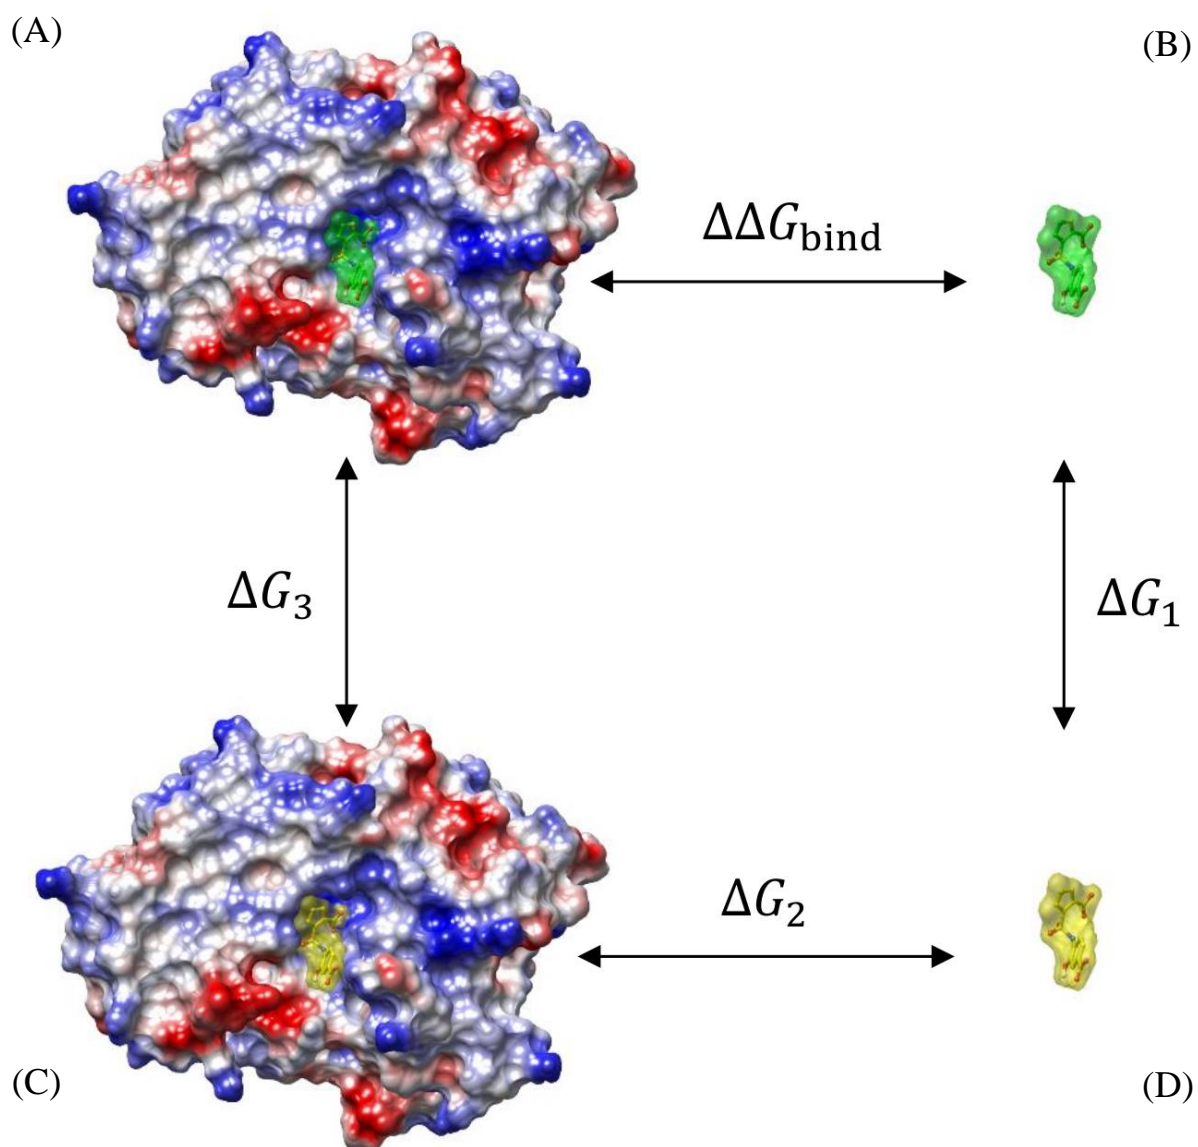

**Figure S1.** Thermodynamics diagram of FEP calculations. (A) full-interaction state of a ligand with surrounding protein and solvation; (B) full-interaction state of a ligand with surrounding solvation; (C) non-interaction state of a ligand with surrounding protein and solvation; (D) non-interaction state of a ligand with surrounding solvation.

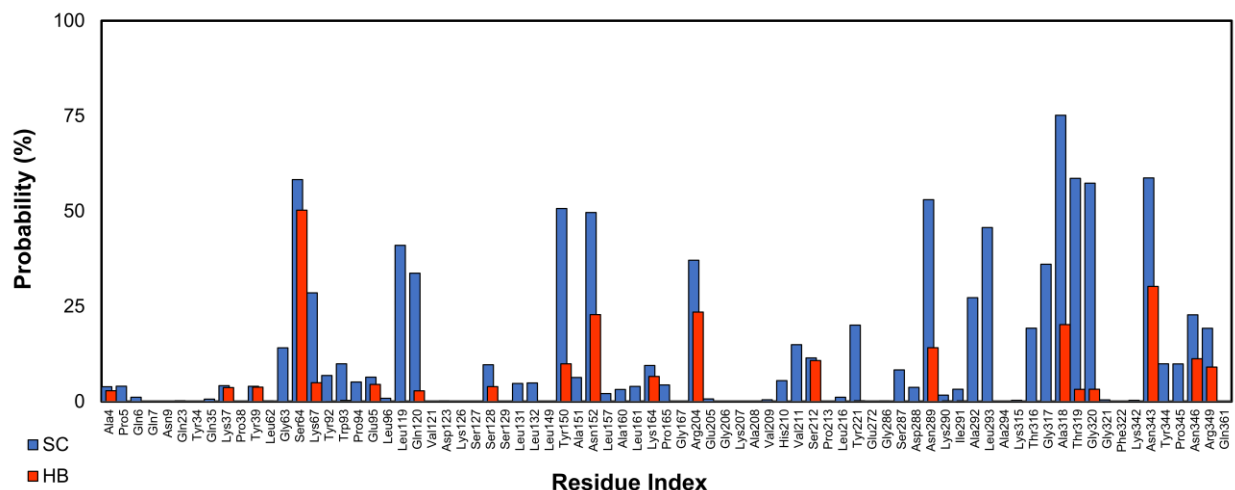

**Figure S2.** SC and HB Contacts between AmpC Residues and Inhibitors. The values were computed over the interval 25-50 ns of MD simulations.

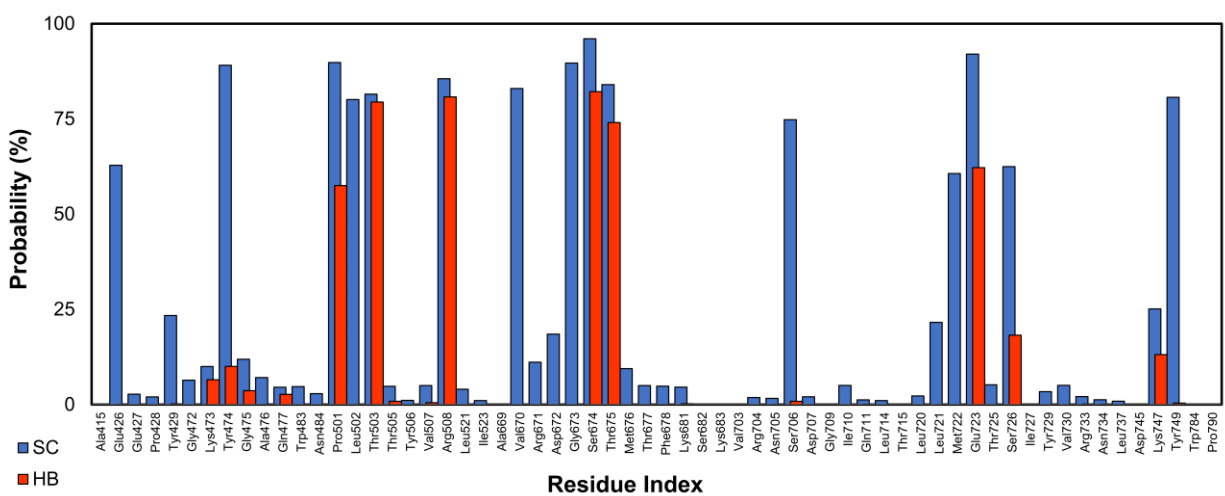

**Figure S3.** SC and HB Contacts between GluK1 Residues and Inhibitors. The values were computed over the interval 25-50 ns of MD simulations.



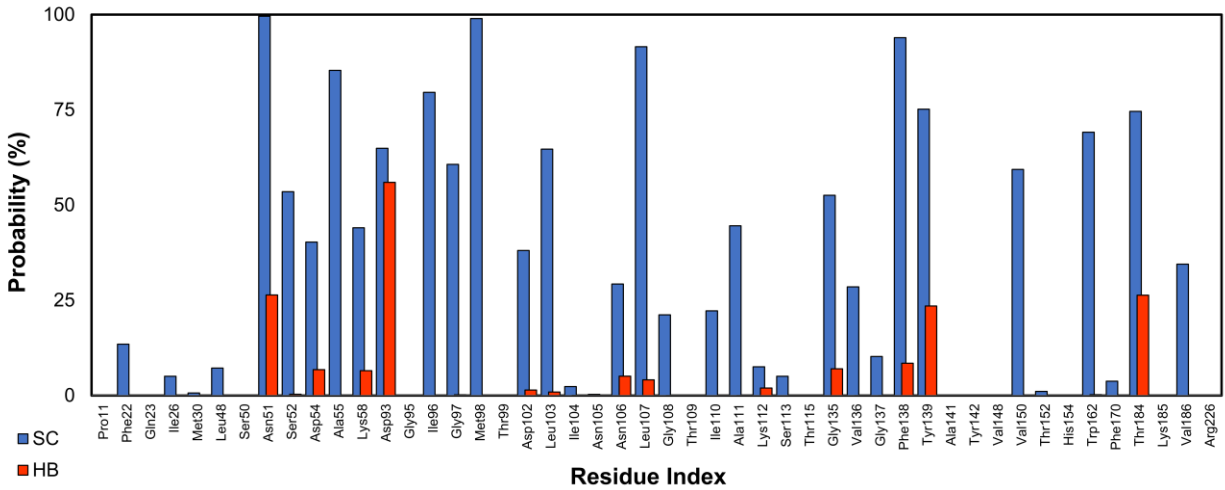

**Figure S4.** SC and HB Contacts between Hsp90 Residues and Inhibitors. The values were computed over the interval 25-50 ns of MD simulations.

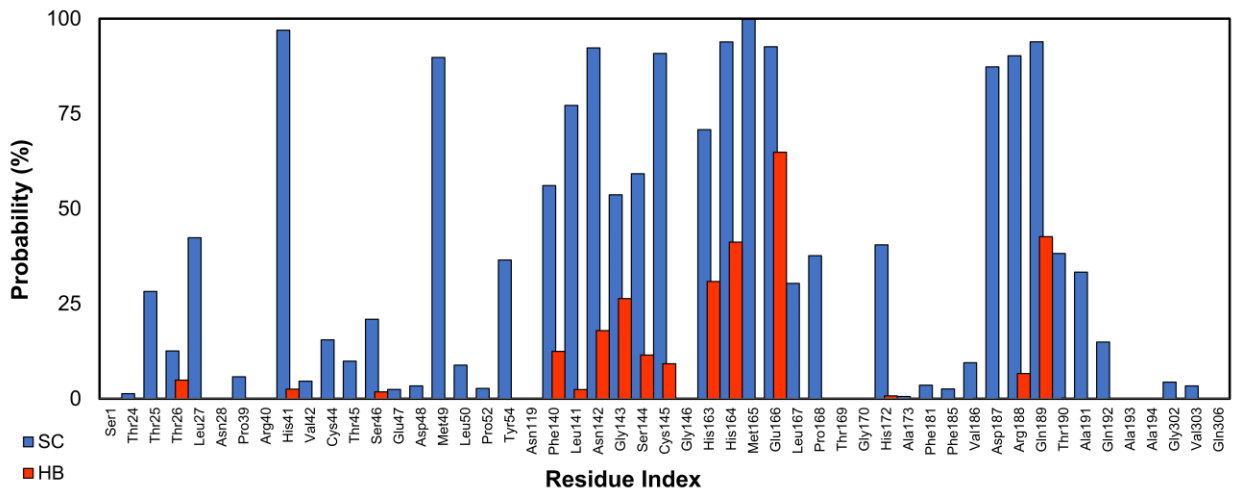

**Figure S5.** SC and HB Contacts between SARS-CoV-2 Mpro Residues and Inhibitors. The values were computed over the interval 25-50 ns of MD simulations.

**Table S6.** Calculated versus Experimental Binding Affinities between AmpC, GluK1, Hsp90, SARS-CoV-2 Mpro and its inhibitors

| N <sup>o</sup> | PDB ID          | PDB ID | $\Delta G_{cou}$ | $\Delta G_{vdW}$ | $\Delta G_{FEP}$  | $\Delta G_{EXP}^b$ |
|----------------|-----------------|--------|------------------|------------------|-------------------|--------------------|
| 1              | AmpC            | 1XGJ   | -2.41            | -5.10            | $-7.50 \pm 1.74$  | -8.24              |
| 2              | GluK1           | 3FV1   | -21.90           | -0.78            | $-22.68 \pm 0.24$ | -12.77             |
| 3              | Hsp90           | 3K97   | -2.74            | -8.66            | $-11.40 \pm 0.91$ | -10.98             |
| 4              | SARS-CoV-2 Mpro | 6M2N   | -0.67            | -5.83            | $-6.51 \pm 0.64$  | -8.25              |

<sup>b</sup>The experimental binding free energies were computed based on the inhibition constant  $k_i$ . The computed error was obtained using the bootstrapping method.

The unit is kcal mol<sup>-1</sup>.

**Table S7.** All-atom RMSD of AmpC, GluK1, Hsp90, SARS-CoV-2 Mpro + ligand and ligand in solution systems.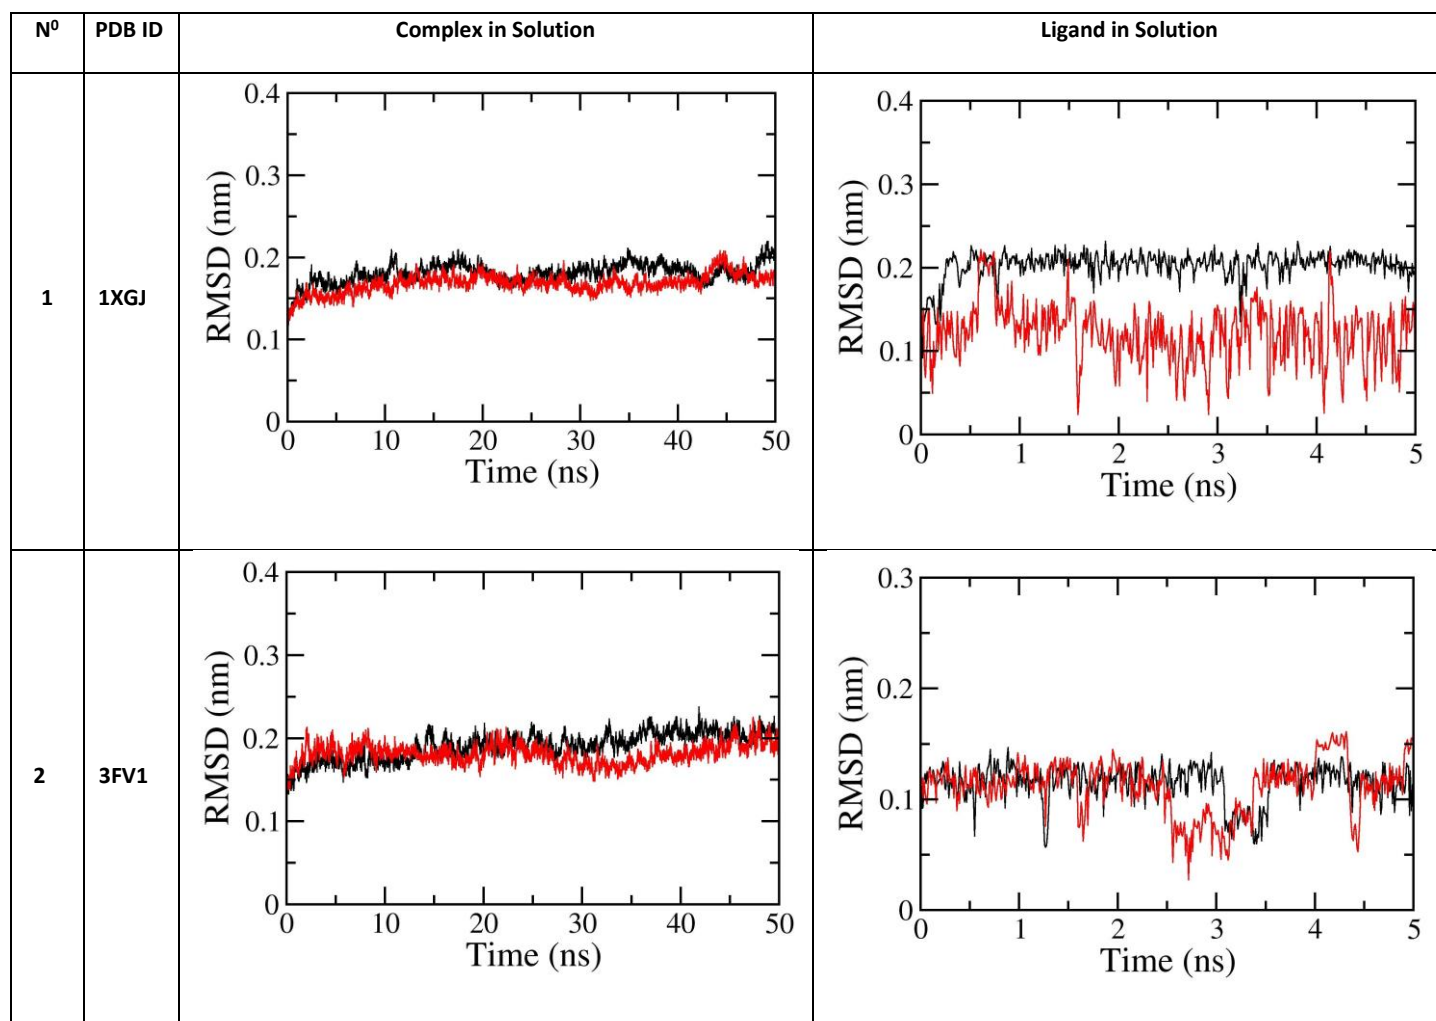

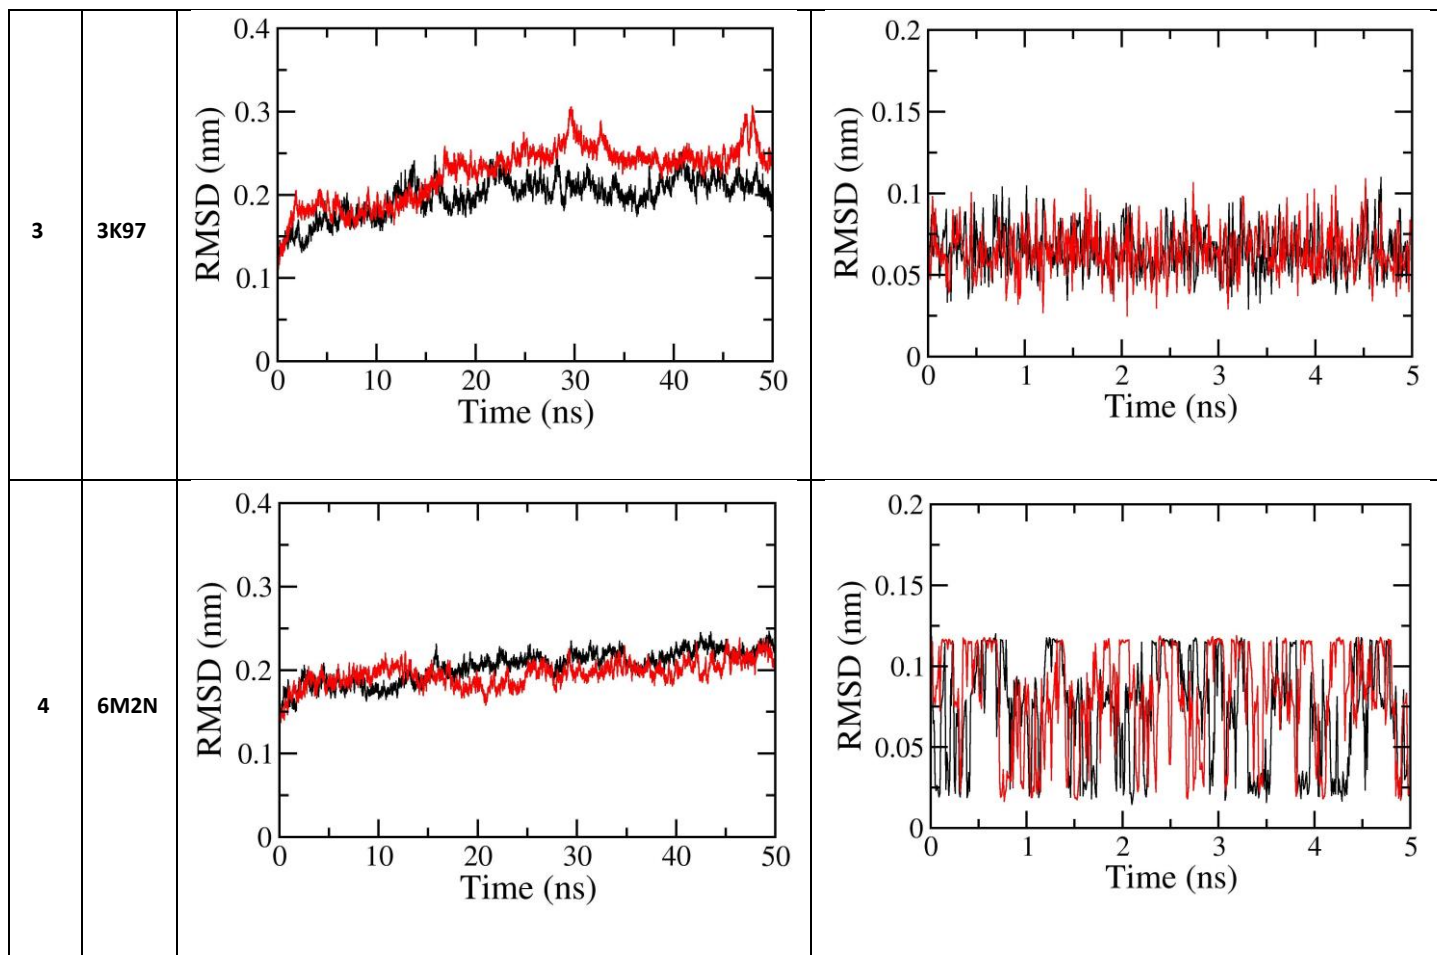

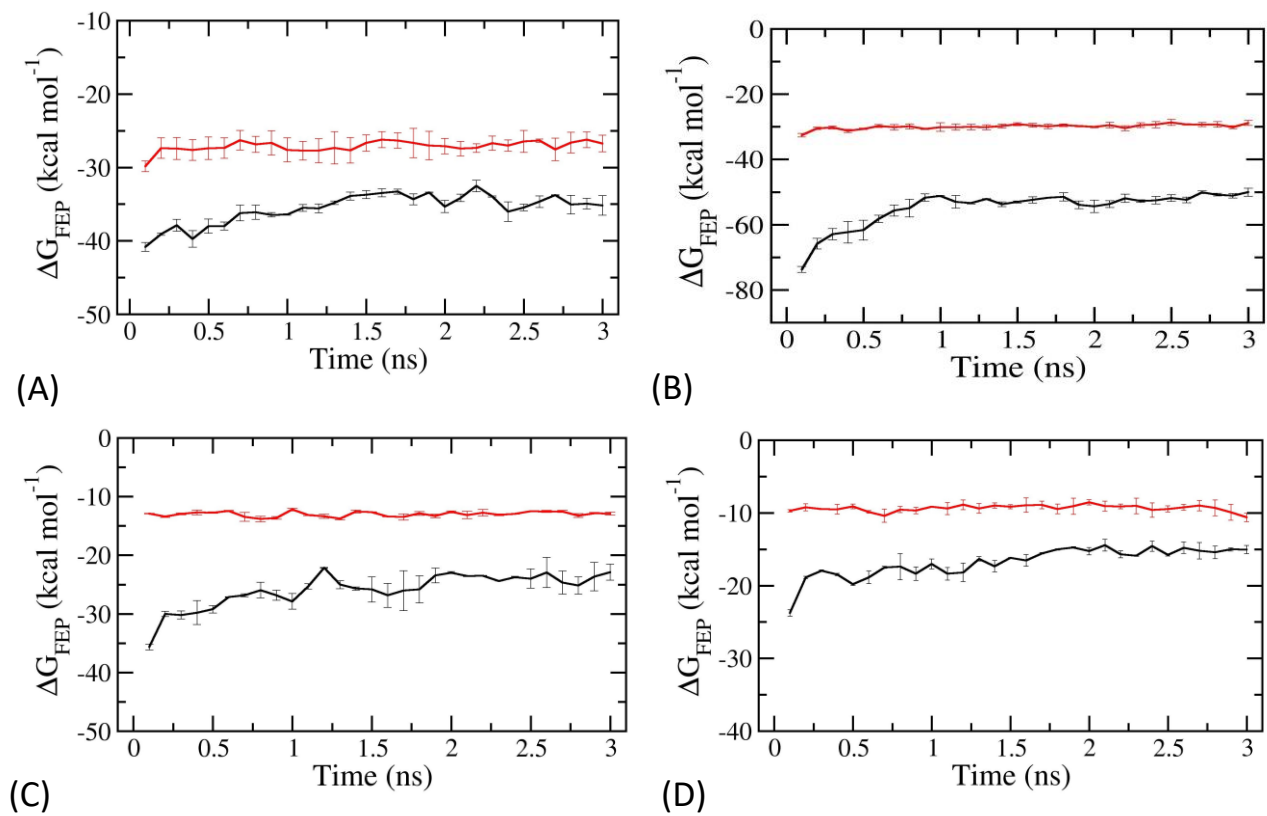

**Figure S6.** Time dependence of binding free energies for solvated complexes: (A) AmpC (*1XGJ*), (B) GluK1 (*3FV1*), Hsp90 (*3K97*), SARS-CoV-2 Mpro (*6M2N*). The values collected in the equilibrium region were used to calculate  $\Delta G_{\text{FEP}}$ . The error bars show the root mean square deviations.
